# Supplementary material
Source: PubMed Central journal article supplement (PMC4612423)
Supplement: NIHMS65637-supplement-1.pdf [file NIHMS65637-supplement-1.pdf]

# Dispersion corrected DFT approaches for Anharmonic Vibrational Frequency Calculations: Nucleobases and their Dimers

Teresa Fornaro<sup>a</sup>, Malgorzata Biczysko<sup>a</sup>, Susanna Monti<sup>a,b</sup>, and Vincenzo Barone<sup>\*,a</sup>

<sup>a</sup> Scuola Normale Superiore, piazza dei Cavalieri 7, I-56126 Pisa, Italy; E-mail: vincenzo.barone@sns.it.

<sup>b</sup> CNR - Institute of Chemistry of Organometallic Compounds - UOS Pisa, Area della Ricerca, via G. Moruzzi 1, I-56124 Pisa, Italy.

## Electronic Supplementary Information

**Table 1.** Experimental, harmonic and anharmonic vibrational frequencies (cm<sup>-1</sup>) and intensities for adenine molecule.

| Mode | Exp.              | Calculated                |         |        |        |      |         |          |        |      |           |        |        | Assignment <sup>b</sup>                                                                                             |
|------|-------------------|---------------------------|---------|--------|--------|------|---------|----------|--------|------|-----------|--------|--------|---------------------------------------------------------------------------------------------------------------------|
|      |                   | Argon matrix <sup>a</sup> |         |        | B3LYP  |      |         | B3LYP-D3 |        |      | B3LYP-DCP |        |        |                                                                                                                     |
|      |                   | harm                      | I(harm) | anharm | I(anh) | harm | I(harm) | anharm   | I(anh) | harm | I(harm)   | anharm | I(anh) |                                                                                                                     |
| 1    | 3569 <sup>d</sup> | 3731                      | 57      | 3536   | 45     | 3730 | 57      | 3534     | 45     | 3746 | 65        | 3552   | 44     | v <sub>asym</sub> NH <sub>2</sub>                                                                                   |
| 2    | 3508 <sup>d</sup> | 3647                      | 87      | 3482   | 72     | 3648 | 87      | 3482     | 72     | 3651 | 89        | 3484   | 74     | vN <sub>9</sub> H                                                                                                   |
| 3    | 3452 <sup>d</sup> | 3598                      | 85      | 3445   | 74     | 3596 | 85      | 3443     | 75     | 3608 | 102       | 3449   | 97     | v <sub>sym</sub> NH <sub>2</sub>                                                                                    |
| 4    |                   | 3243                      | 0       | 3116   | 2      | 3241 | 0       | 3112     | 1      | 3272 | 0         | 3149   | 1      | vC <sub>8</sub> H                                                                                                   |
| 5    | 3057              | 3171                      | 17      | 3045   | 21     | 3169 | 17      | 3042     | 21     | 3195 | 16        | 3068   | 18     | vC <sub>2</sub> H                                                                                                   |
| 6    | 1633              | 1660                      | 599     | 1621   | 163    | 1662 | 593     | 1624     | 273    | 1714 | 600       | 1678   | 348    | δ <sub>sciss</sub> NH <sub>2</sub> , vC <sub>5</sub> C <sub>6</sub> , vC <sub>6</sub> N <sub>6</sub>                |
| 7    | 1612              | 1639                      | 112     | 1594   | 67     | 1638 | 112     | 1594     | 79     | 1683 | 111       | 1641   | 91     | vN <sub>3</sub> C <sub>4</sub> , vC <sub>5</sub> C <sub>6</sub>                                                     |
| 8    | 1599              | 1608                      | 6       | 1565   | 2      | 1609 | 9       | 1565     | 2      | 1631 | 58        | 1586   | 80     | δ <sub>sciss</sub> NH <sub>2</sub> , vC <sub>4</sub> C <sub>5</sub> , vC <sub>5</sub> C <sub>6</sub>                |
| 9    | 1482              | 1518                      | 9       | 1483   | 9      | 1517 | 6       | 1482     | 7      | 1555 | 22        | 1521   | 25     | vN <sub>7</sub> C <sub>8</sub> , δC <sub>8</sub> H                                                                  |
| 10   | 1474              | 1503                      | 76      | 1463   | 38     | 1503 | 79      | 1463     | 25     | 1539 | 35        | 1498   | 7      | vN <sub>1</sub> C <sub>6</sub> , δC <sub>2</sub> H, vC <sub>2</sub> N <sub>3</sub> , vC <sub>6</sub> N <sub>6</sub> |
| 11   | 1419              | 1435                      | 31      | 1406   | 19     | 1435 | 30      | 1406     | 19     | 1483 | 45        | 1453   | 29     | vC <sub>4</sub> C <sub>5</sub> , vC <sub>4</sub> N <sub>9</sub> , δC <sub>2</sub> H                                 |
| 12   | 1389              | 1417                      | 8       | 1381   | 6      | 1416 | 8       | 1379     | 7      | 1455 | 23        | 1419   | 10     | δN <sub>9</sub> H, δC <sub>2</sub> H, vC <sub>4</sub> N <sub>9</sub> , vC <sub>8</sub> N <sub>9</sub>               |
| 13   | 1345              | 1368                      | 48      | 1337   | 24     | 1367 | 45      | 1337     | 22     | 1416 | 66        | 1384   | 38     | δC <sub>2</sub> H, vC <sub>8</sub> N <sub>9</sub> , δC <sub>8</sub> H, vC <sub>6</sub> N <sub>6</sub>               |
| 14   | 1328              | 1359                      | 27      | 1330   | 33     | 1357 | 31      | 1328     | 34     | 1398 | 29        | 1370   | 18     | vN <sub>1</sub> C <sub>2</sub> , vC <sub>5</sub> N <sub>7</sub> , vC <sub>4</sub> C <sub>5</sub>                    |

|    |                  |      |     |                  |     |      |     |                  |     |      |     |                  |     |                                                                                              |
|----|------------------|------|-----|------------------|-----|------|-----|------------------|-----|------|-----|------------------|-----|----------------------------------------------------------------------------------------------|
| 15 | 1290             | 1333 | 58  | 1298             | 51  | 1331 | 58  | 1296             | 55  | 1377 | 37  | 1348             | 36  | $\nu\text{C}_2\text{N}_3, \nu\text{N}_1\text{C}_2$                                           |
| 16 | 1240             | 1266 | 23  | 1240             | 19  | 1264 | 24  | 1239             | 20  | 1290 | 19  | 1267             | 18  | $\delta\text{C}_8\text{H}, \nu\text{N}_7\text{C}_8, \delta\text{N}_9\text{H}$                |
| 17 | 1229             | 1245 | 13  | 1224             | 3   | 1245 | 13  | 1224             | 7   | 1269 | 12  | 1250             | 8   | $\delta_{\text{rock}}\text{NH}_2, \nu\text{C}_5\text{N}_7, \nu\text{C}_2\text{N}_3$          |
| 18 | 1127             | 1144 | 22  | 1124             | 11  | 1144 | 21  | 1122             | 1   | 1175 | 18  | 1155             | 11  | $\nu\text{C}_4\text{N}_9, \delta\text{r}, \nu\text{C}_6\text{N}_6$                           |
| 19 | 1061             | 1078 | 19  | 1054             | 7   | 1078 | 19  | 1054             | 9   | 1107 | 19  | 1083             | 14  | $\nu\text{C}_8\text{N}_9, \delta\text{N}_9\text{H}$                                          |
| 20 | 1017             | 1016 | 7   | 994              | 7   | 1019 | 7   | 995              | 5   | 1021 | 3   | 998              | 1   | $\delta_{\text{rock}}\text{NH}_2, \nu\text{N}_1\text{C}_6$                                   |
| 21 | 958              | 973  | 4   | 953              | 3   | 972  | 4   | 953              | 3   | 994  | 3   | 976              | 3   | $\gamma\text{C}_2\text{H}$                                                                   |
| 22 | 927              | 944  | 15  | 929              | 12  | 944  | 15  | 929              | 11  | 955  | 14  | 942              | 11  | $\delta\text{r}, \nu\text{C}_4\text{C}_5$                                                    |
| 23 | 887              | 898  | 11  | 886              | 9   | 898  | 11  | 885              | 8   | 906  | 13  | 894              | 7   | $\delta\text{ R}$                                                                            |
| 24 | 848              | 854  | 4   | 814              | 20  | 853  | 3   | 813              | 19  | 884  | 2   | 867              | 2   | $\gamma\text{C}_8\text{H}$                                                                   |
| 25 | 802              | 825  | 14  | 778              | 6   | 825  | 14  | 779              | 6   | 856  | 13  | 840              | 12  | $\gamma\text{C}_8\text{H}, \tau\text{R}, \tau\text{r}, \gamma\text{C}_6\text{N}_6$           |
| 26 | 717              | 725  | 3   | 715              | 2   | 725  | 3   | 715              | 2   | 741  | 3   | 732              | 3   | $\nu\text{N}_3\text{C}_4, \nu\text{C}_5\text{N}_7, \nu\text{C}_4\text{N}_9$ (ring breathing) |
| 27 | 678              | 692  | 1   | 666              | 2   | 691  | 1   | 665              | 2   | 710  | 0   | 699              | 0   | $\gamma\text{C}_6\text{N}_6, \tau\text{r}, \tau\text{R}$                                     |
| 28 | 655              | 666  | 7   | 651              | 10  | 666  | 7   | 651              | 10  | 680  | 6   | 668              | 7   | $\tau\text{r}$                                                                               |
| 29 | 610              | 618  | 0   | 610              | 1   | 618  | 0   | 609              | 1   | 625  | 1   | 618              | 1   | $\delta\text{r}, \nu\text{C}_5\text{C}_6, \delta\text{R}$                                    |
| 30 | 566              | 581  | 61  | 545              | 6   | 580  | 60  | 544              | 0   | 591  | 61  | 578              | 50  | $\gamma\text{N}_9\text{H}, \gamma\text{C}_2\text{H}, \tau\text{R}, \tau\text{r}$             |
| 31 |                  | 534  | 29  | 487              | 141 | 534  | 18  | 498              | 214 | 537  | 3   | 532              | 3   | $\delta\text{ R}, \gamma\text{N}_9\text{H}$                                                  |
| 32 | 513              | 532  | 17  | 515              | 60  | 532  | 24  | 505              | 15  | 554  | 1   | 514              | 75  | $\tau\text{NH}_2, \gamma\text{N}_9\text{H}$                                                  |
| 33 |                  | 527  | 22  | 493              | 4   | 527  | 25  | 491              | 41  | 528  | 4   | 523              | 3   | $\tau\text{NH}_2, \delta\text{R}, \delta\text{C}_6\text{N}_6, \nu\text{C}_4\text{N}_9$       |
| 34 | 503              | 512  | 3   | 487              | 45  | 513  | 3   | 486              | 60  | 542  | 53  | 528              | 36  | $\tau\text{NH}_2, \gamma\text{N}_9\text{H}$                                                  |
| 35 |                  | 300  | 0   | 293              | 0   | 300  | 0   | 292              | 0   | 306  | 0   | 302              | 0   | $\tau\text{Rr}$                                                                              |
| 36 | 276              | 277  | 15  | 274              | 14  | 281  | 14  | 277              | 13  | 282  | 12  | 280              | 12  | $\delta\text{C}_6\text{N}_6, \delta\text{R}, \delta\text{r}$                                 |
| 37 | 214              | 240  | 134 | 240 <sup>c</sup> | 107 | 239  | 128 | 239 <sup>c</sup> | 103 | 228  | 1   | 228 <sup>c</sup> | 0   | $\tau\text{Rr}, \gamma_{\text{wagg}}\text{NH}_2$                                             |
| 38 | 184 <sup>f</sup> | 207  | 94  | 208 <sup>c</sup> | 77  | 205  | 100 | 205 <sup>c</sup> | 81  | 104  | 158 | 105 <sup>c</sup> | 101 | $\gamma_{\text{wagg}}\text{NH}_2, \tau\text{Rr}$                                             |
| 39 |                  | 165  | 1   | 158              | 1   | 165  | 1   | 157              | 1   | 168  | 38  | 153              | 30  | $\tau\text{Rr}, \gamma\text{C}_6\text{N}_6$                                                  |

<sup>a</sup>From Ref.<sup>34</sup>.

<sup>b</sup>Abbreviations:  $\nu$  = stretching;  $\delta$  = in-plane bending;  $\gamma$  = out-of-plane bending;  $\tau$  = torsional; sciss = scissoring; rock = rocking; wagg = wagging; asym = asymmetric; sym = symmetric; R and r refer to the 6-membered ring and 5-membered ring, respectively.

<sup>c</sup>Modes excluded from the anharmonic calculation.

<sup>d</sup>From Ref.<sup>146</sup>.

<sup>f</sup>From Ref.<sup>144</sup>.

**Table 2.** Experimental, harmonic and anharmonic vibrational frequencies ( $\text{cm}^{-1}$ ) and intensities for cytosine molecule.

| Exp.                                            |      | Calculated |         |        |        |          |         |        |        |           |         |        |        |                                                                                               |
|-------------------------------------------------|------|------------|---------|--------|--------|----------|---------|--------|--------|-----------|---------|--------|--------|-----------------------------------------------------------------------------------------------|
| Argon matrix <sup>a,b</sup><br>(amino-oxo form) |      | B3LYP      |         |        |        | B3LYP-D3 |         |        |        | B3LYP-DCP |         |        |        | Assignment <sup>c</sup>                                                                       |
| Mode                                            |      | harm       | I(harm) | anharm | I(anh) | harm     | I(harm) | anharm | I(anh) | harm      | I(harm) | anharm | I(anh) |                                                                                               |
| 1                                               | 3563 | 3733       | 48      | 3540   | 37     | 3732     | 48      | 3538   | 37     | 3750      | 56      | 3562   | 24     | $\nu_{\text{asym}}\text{NH}_2$                                                                |
| 2                                               | 3471 | 3617       | 71      | 3450   | 53     | 3617     | 72      | 3451   | 56     | 3623      | 70      | 3457   | 49     | $\nu\text{N}_1\text{H}$                                                                       |
| 3                                               | 3440 | 3597       | 83      | 3438   | 76     | 3595     | 84      | 3433   | 74     | 3608      | 104     | 3455   | 121    | $\nu_{\text{sym}}\text{NH}_2$                                                                 |
| 4                                               |      | 3221       | 2       | 3086   | 3      | 3220     | 2       | 3083   | 3      | 3270      | 0       | 3137   | 1      | $\nu\text{C}_5\text{H}$                                                                       |
| 5                                               |      | 3196       | 2       | 3047   | 4      | 3194     | 2       | 3043   | 3      | 3247      | 1       | 3109   | 2      | $\nu\text{C}_6\text{H}$                                                                       |
| 6                                               | 1734 | 1766       | 759     | 1736   | 469    | 1766     | 754     | 1738   | 442    | 1794      | 801     | 1761   | 381    | $\nu\text{C}_2\text{O}$                                                                       |
| 7                                               | 1656 | 1686       | 471     | 1647   | 255    | 1685     | 480     | 1649   | 283    | 1738      | 421     | 1702   | 203    | $\nu\text{C}_5\text{C}_6, \nu\text{N}_3\text{C}_4$                                            |
| 8                                               | 1595 | 1629       | 138     | 1586   | 95     | 1631     | 129     | 1585   | 156    | 1641      | 267     | 1596   | 296    | $\delta_{\text{sciss}}\text{NH}_2$                                                            |
| 9                                               | 1538 | 1568       | 151     | 1524   | 55     | 1567     | 149     | 1534   | 124    | 1617      | 148     | 1579   | 118    | $\nu\text{N}_3\text{C}_4, \nu\text{C}_4\text{C}_5$                                            |
| 10                                              | 1475 | 1502       | 148     | 1461   | 51     | 1503     | 150     | 1460   | 126    | 1538      | 125     | 1498   | 59     | $\nu\text{N}_3\text{C}_4, \nu\text{C}_4\text{N}_4, \delta\text{C}_6\text{H}$                  |
| 11                                              | 1422 | 1442       | 78      | 1412   | 58     | 1443     | 77      | 1412   | 60     | 1472      | 53      | 1435   | 36     | $\delta\text{N}_1\text{H}$                                                                    |
| 12                                              | 1337 | 1355       | 52      | 1328   | 29     | 1355     | 55      | 1327   | 30     | 1377      | 34      | 1351   | 13     | $\delta\text{C}_6\text{H}, \nu\text{C}_4\text{N}_4, \delta\text{C}_5\text{H}$                 |
| 13                                              | 1244 | 1260       | 23      | 1225   | 24     | 1260     | 27      | 1226   | 28     | 1310      | 30      | 1271   | 25     | $\nu\text{C}_2\text{N}_3$                                                                     |
| 14                                              | 1195 | 1213       | 50      | 1192   | 39     | 1220     | 50      | 1193   | 38     | 1236      | 49      | 1213   | 38     | $\delta\text{C}_6\text{H}, \delta\text{N}_1\text{H}, \nu\text{C}_6\text{N}_1$                 |
| 15                                              | 1090 | 1125       | 2       | 1111   | 5      | 1131     | 3       | 1113   | 5      | 1139      | 3       | 1121   | 5      | $\delta\text{C}_5\text{H}, \nu\text{C}_6\text{N}_1, \nu\text{C}_5\text{C}_6$                  |
| 16                                              | 1088 | 1092       | 44      | 1066   | 39     | 1093     | 44      | 1065   | 38     | 1108      | 31      | 1085   | 23     | $\delta_{\text{rock}}\text{NH}_2$                                                             |
| 17                                              |      | 989        | 1       | 970    | 0      | 988      | 1       | 969    | 0      | 1005      | 1       | 989    | 1      | $\delta$ ring, $\nu\text{C}_4\text{C}_5$                                                      |
| 18                                              |      | 970        | 0       | 941    | 1      | 969      | 0       | 940    | 1      | 993       | 0       | 971    | 0      | $\gamma\text{C}_6\text{H}$                                                                    |
| 19                                              |      | 926        | 3       | 898    | 5      | 925      | 4       | 897    | 5      | 950       | 2       | 927    | 2      | $\nu\text{N}_1\text{C}_2, \nu\text{C}_4\text{C}_5, \delta_{\text{rock}}\text{NH}_2$           |
| 20                                              | 781  | 793        | 47      | 772    | 38     | 793      | 46      | 772    | 38     | 815       | 43      | 804    | 39     | $\gamma\text{C}_2\text{O}, \tau$ ring                                                         |
| 21                                              | 768  | 777        | 3       | 759    | 4      | 776      | 3       | 759    | 3      | 797       | 0       | 785    | 1      | $\gamma\text{C}_5\text{H}, \gamma\text{C}_4\text{N}_4, \gamma\text{C}_2\text{O}$              |
| 22                                              | 743  | 769        | 4       | 751    | 4      | 768      | 4       | 750    | 4      | 793       | 3       | 780    | 2      | ring breathing                                                                                |
| 23                                              | 717  | 728        | 37      | 709    | 33     | 727      | 37      | 708    | 33     | 739       | 32      | 723    | 32     | $\gamma\text{C}_5\text{H}, \tau$ ring, $\gamma\text{C}_4\text{N}_4, \gamma\text{N}_1\text{H}$ |
| 24                                              | 615  | 641        | 53      | 607    | 53     | 638      | 53      | 606    | 53     | 647       | 55      | 637    | 49     | $\gamma\text{N}_1\text{H}$                                                                    |
| 25                                              | 576  | 578        | 3       | 572    | 2      | 578      | 2       | 571    | 2      | 585       | 2       | 579    | 2      | $\delta$ ring                                                                                 |

|    |     |     |     |                  |     |     |     |                  |     |     |    |     |    |                                                                    |
|----|-----|-----|-----|------------------|-----|-----|-----|------------------|-----|-----|----|-----|----|--------------------------------------------------------------------|
| 26 | 537 | 546 | 3   | 536              | 4   | 546 | 3   | 537              | 3   | 553 | 3  | 545 | 24 | $\delta$ ring, $\tau$ NH <sub>2</sub>                              |
| 27 | 529 | 534 | 3   | 518              | 16  | 537 | 3   | 535              | 5   | 543 | 4  | 534 | 5  | $\delta$ ring, $\tau$ NH <sub>2</sub> , $\delta$ C <sub>2</sub> O  |
| 28 |     | 526 | 13  | 498              | 22  | 526 | 13  | 494              | 12  | 550 | 4  | 517 | 20 | $\tau$ NH <sub>2</sub> , $\delta$ C <sub>2</sub> O                 |
| 29 | 400 | 408 | 16  | 393              | 17  | 407 | 17  | 392              | 18  | 418 | 15 | 413 | 15 | $\tau$ ring                                                        |
| 30 | 330 | 359 | 3   | 357              | 2   | 363 | 3   | 358              | 3   | 364 | 4  | 363 | 4  | $\delta$ C <sub>4</sub> N <sub>4</sub> , $\delta$ C <sub>2</sub> O |
| 31 |     | 216 | 214 | 218 <sup>d</sup> | 171 | 212 | 205 | 213 <sup>d</sup> | 164 |     |    |     |    | $\gamma$ <sub>wagg</sub> NH <sub>2</sub>                           |
| 32 |     | 203 | 5   | 194              | 3   | 202 | 13  | 187              | 7   | 204 | 15 | 198 | 8  | $\gamma$ <sub>wagg</sub> NH <sub>2</sub> , $\tau$ ring             |
| 33 |     | 141 | 2   | 135              | 2   | 140 | 2   | 134              | 2   | 136 | 2  | 134 | 2  | $\tau$ ring                                                        |

<sup>a</sup>From Ref.<sup>35</sup>.

<sup>b</sup>From Ref.<sup>147</sup>.

<sup>c</sup>Abbreviations:  $\nu$  = stretching;  $\delta$  = in-plane bending;  $\gamma$  = out-of-plane bending;  $\tau$  = torsional; sciss = scissoring; rock = rocking; wagg = wagging; asym = asymmetric; sym = symmetric.

<sup>d</sup>Modes excluded from the anharmonic calculation.

**Table 3.** Experimental, harmonic and anharmonic vibrational frequencies (cm<sup>-1</sup>) and intensities for uracil molecule.

| Mode | Exp.                   | Calculated |         |        |          |      |         |           |        |      |         |         |        | Assignment <sup>b</sup>                                          |
|------|------------------------|------------|---------|--------|----------|------|---------|-----------|--------|------|---------|---------|--------|------------------------------------------------------------------|
|      | Ar matrix <sup>a</sup> | B3LYP      |         |        | B3LYP-D3 |      |         | B3LYP-DCP |        |      | I (anh) |         |        |                                                                  |
|      |                        | harm       | I(harm) | anharm | I(anh)   | harm | I(harm) | anharm    | I(anh) | harm |         | I(harm) | anharm |                                                                  |
| 1    | 3482                   | 3639       | 105     | 3473   | 88       | 3639 | 106     | 3473      | 88     | 3643 | 113     | 3475    | 86     | $\nu$ N <sub>1</sub> H                                           |
| 2    | 3433                   | 3594       | 68      | 3427   | 17       | 3595 | 68      | 3430      | 55     | 3598 | 69      | 3429    | 56     | $\nu$ N <sub>3</sub> H                                           |
| 3    | 3130                   | 3246       | 1       | 3111   | 0        | 3246 | 1       | 3109      | 0      | 3293 | 4       | 3162    | 3      | $\nu$ C <sub>5</sub> H                                           |
| 4    |                        | 3205       | 2       | 3062   | 3        | 3203 | 2       | 3060      | 3      | 3252 | 1       | 3118    | 1      | $\nu$ C <sub>6</sub> H                                           |
| 5    | 1762                   | 1798       | 623     | 1771   | 347      | 1799 | 630     | 1770      | 492    | 1832 | 644     | 1801    | 113    | $\nu$ C <sub>2</sub> =O                                          |
| 6    | 1733                   | 1764       | 771     | 1749   | 436      | 1765 | 761     | 1749      | 232    | 1801 | 796     | 1773    | 417    | $\nu$ C <sub>4</sub> =O                                          |
| 7    | 1644                   | 1673       | 61      | 1640   | 63       | 1672 | 62      | 1638      | 64     | 1728 | 32      | 1694    | 42     | $\nu$ C <sub>5</sub> =C <sub>6</sub>                             |
| 8    | 1473                   | 1499       | 88      | 1463   | 55       | 1500 | 82      | 1463      | 52     | 1535 | 128     | 1492    | 88     | $\nu$ ring, $\delta$ N <sub>1</sub> H                            |
| 9    | 1401                   | 1381       | 33      | 1349   | 14       | 1383 | 48      | 1350      | 15     | 1401 | 9       | 1362    | 11     | $\delta$ N <sub>3</sub> H + $\delta$ CH                          |
| 10   | 1389                   | 1417       | 13      | 1386   | 9        | 1417 | 8       | 1386      | 8      | 1430 | 21      | 1396    | 17     | $\nu$ ring, $\delta$ N <sub>1</sub> H, $\delta$ N <sub>3</sub> H |
| 11   | 1359                   | 1403       | 93      | 1372   | 73       | 1405 | 87      | 1371      | 69     | 1450 | 67      | 1418    | 49     | $\nu$ ring, $\delta$ N <sub>3</sub> H, $\delta$ CH               |

|    |      |      |     |      |    |      |     |      |    |      |    |      |    |                                                |
|----|------|------|-----|------|----|------|-----|------|----|------|----|------|----|------------------------------------------------|
| 12 | 1219 | 1227 | 2   | 1202 | 20 | 1230 | 8   | 1204 | 26 | 1225 | 84 | 1203 | 82 | v ring, $\delta$ NH, $\delta$ CH               |
| 13 | 1186 | 1195 | 107 | 1167 | 87 | 1199 | 106 | 1165 | 81 | 1277 | 11 | 1242 | 5  | v ring, $\delta$ NH, $\delta$ CH               |
| 14 | 1076 | 1085 | 5   | 1064 | 5  | 1087 | 5   | 1062 | 7  | 1109 | 8  | 1091 | 7  | v ring, $\delta$ CH, $\delta$ N <sub>1</sub> H |
| 15 | 987  | 992  | 7   | 977  | 8  | 991  | 8   | 976  | 8  | 1005 | 6  | 979  | 5  | $\delta$ ring                                  |
| 16 | 963  | 964  | 9   | 942  | 9  | 968  | 9   | 946  | 9  | 994  | 68 | 973  | 49 | v ring, $\delta$ N <sub>3</sub> H, $\delta$ CH |
| 17 | 958  | 973  | 0   | 949  | 0  | 972  | 0   | 948  | 0  | 1005 | 0  | 981  | 0  | $\gamma$ CH                                    |
| 18 | 806  | 822  | 65  | 803  | 50 | 822  | 65  | 803  | 50 | 845  | 41 | 830  | 42 | $\gamma$ C <sub>4</sub> =O, $\gamma$ CH        |
| 19 | 757  | 769  | 34  | 746  | 32 | 769  | 34  | 745  | 32 | 792  | 5  | 778  | 4  | $\gamma$ C <sub>2</sub> =O                     |
| 20 | 759  | 770  | 3   | 753  | 2  | 769  | 3   | 752  | 2  | 794  | 7  | 780  | 7  | ring breathing                                 |
| 21 | 718  | 731  | 17  | 713  | 14 | 731  | 17  | 712  | 14 | 745  | 5  | 732  | 5  | $\gamma$ CH                                    |
| 22 | 662  | 689  | 66  | 643  | 58 | 687  | 66  | 641  | 61 | 699  | 20 | 679  | 19 | $\gamma$ N <sub>3</sub> H                      |
| 23 | 562  | 571  | 43  | 530  | 31 | 569  | 43  | 528  | 31 | 581  | 22 | 577  | 19 | $\gamma$ N <sub>1</sub> H                      |
| 24 | 551  | 559  | 5   | 550  | 5  | 561  | 4   | 560  | 3  | 572  | 59 | 563  | 57 | $\delta$ ring                                  |
| 25 | 537  | 542  | 7   | 535  | 7  | 542  | 9   | 535  | 8  | 555  | 2  | 548  | 1  | $\delta$ C=O                                   |
| 26 | 516  | 521  | 21  | 515  | 20 | 523  | 21  | 516  | 20 | 531  | 29 | 525  | 29 | $\delta$ ring                                  |
| 27 | 391  | 387  | 21  | 387  | 19 | 389  | 21  | 387  | 19 | 396  | 18 | 395  | 14 | $\delta$ C=O, $\delta$ ring                    |
| 28 | 411  | 401  | 22  | 391  | 24 | 400  | 22  | 390  | 24 | 411  | 22 | 407  | 20 | torsion                                        |
| 29 | 185  | 170  | 0   | 163  | 0  | 170  | 0   | 162  | 0  | 170  | 0  | 168  | 0  | torsion                                        |
| 30 |      | 155  | 2   | 147  | 2  | 154  | 2   | 146  | 2  | 153  | 2  | 152  | 2  | torsion                                        |

<sup>a</sup> From Ref. <sup>145,154,155</sup>.

<sup>b</sup> Abbreviations: v = stretching;  $\delta$  = in-plane bending;  $\gamma$  = out-of-plane bending;  $\tau$  = torsional; sciss = scissoring; rock = rocking; wagg = wagging; asym = asymmetric; sym = symmetric.

**Table 4.** Experimental, harmonic and anharmonic vibrational frequencies ( $\text{cm}^{-1}$ ) and intensities for hypoxanthine molecule.

| Mode | Exp.                                                                 | Calculated |         |        |        |          |         |        |        |           |         |        |        | Assignment <sup>b</sup>                                                                |
|------|----------------------------------------------------------------------|------------|---------|--------|--------|----------|---------|--------|--------|-----------|---------|--------|--------|----------------------------------------------------------------------------------------|
|      | Argon matrix <sup>a</sup><br>(oxo-N <sub>1</sub> H-N <sub>9</sub> H) | B3LYP      |         |        |        | B3LYP-D3 |         |        |        | B3LYP-DCP |         |        |        |                                                                                        |
|      |                                                                      | harm       | I(harm) | anharm | I(anh) | harm     | I(harm) | anharm | I(anh) | harm      | I(harm) | anharm | I(anh) |                                                                                        |
| 1    | 3465                                                                 | 3641       | 86      | 3475   | 71     | 3641     | 86      | 3478   | 71     | 3644      | 89      | 3479   | 74     | $\nu_{\text{N}_9\text{H}}$                                                             |
| 2    | 3428                                                                 | 3588       | 67      | 3421   | 52     | 3588     | 67      | 3422   | 48     | 3592      | 73      | 3422   | 58     | $\nu_{\text{N}_1\text{H}}$                                                             |
| 3    |                                                                      | 3248       | 0       | 3120   | 1      | 3245     | 0       | 3116   | 1      | 3275      | 0       | 3150   | 1      | $\nu_{\text{C}_8\text{H}}$                                                             |
| 4    |                                                                      | 3182       | 3       | 3051   | 5      | 3180     | 3       | 3047   | 4      | 3211      | 2       | 3083   | 1      | $\nu_{\text{C}_2\text{H}}$                                                             |
| 5    | 1753/1742                                                            | 1790       | 719     | 1755   | 570    | 1791     | 718     | 1756   | 562    | 1829      | 703     | 1799   | 452    | $\nu_{\text{C}_6\text{O}}$                                                             |
| 6    | 1608                                                                 | 1626       | 85      | 1590   | 54     | 1625     | 85      | 1590   | 54     | 1673      | 87      | 1635   | 52     | $\nu_{\text{C}_2\text{N}_3}, \delta_{\text{C}_2\text{H}}$                              |
| 7    | 1556                                                                 | 1590       | 71      | 1549   | 53     | 1590     | 72      | 1549   | 26     | 1637      | 70      | 1598   | 58     | $\nu_{\text{N}_3\text{C}_4}, \nu_{\text{C}_4\text{C}_5}$                               |
| 8    | 1472                                                                 | 1526       | 29      | 1494   | 24     | 1525     | 28      | 1493   | 24     | 1571      | 16      | 1538   | 15     | $\nu_{\text{N}_7\text{C}_8}, \nu_{\text{C}_4\text{C}_5}$                               |
| 9    | 1424                                                                 | 1479       | 5       | 1441   | 2      | 1480     | 4       | 1440   | 1      | 1515      | 3       | 1474   | 2      | $\nu_{\text{N}_7\text{C}_8}, \delta_{\text{N}_1\text{H}}$                              |
| 10   | 1400                                                                 | 1432       | 6       | 1398   | 2      | 1433     | 6       | 1397   | 2      | 1474      | 16      | 1436   | 8      | $\delta_{\text{N}_1\text{H}}, \delta_{\text{C}_2\text{H}}, \nu_{\text{C}_4\text{C}_5}$ |
| 11   | 1342                                                                 | 1403       | 19      | 1367   | 12     | 1402     | 19      | 1367   | 12     | 1439      | 26      | 1395   | 17     | $\delta_{\text{N}_9\text{H}}, \delta_{\text{C}_2\text{H}}$                             |
| 12   | 1338                                                                 | 1372       | 32      | 1336   | 28     | 1371     | 32      | 1336   | 27     | 1416      | 39      | 1379   | 35     | $\nu_{\text{C}_5\text{N}_7}, \delta_{\text{C}_2\text{H}}, \nu_{\text{C}_2\text{N}_3}$  |
| 13   | 1332                                                                 | 1355       | 5       | 1329   | 6      | 1356     | 5       | 1331   | 4      | 1387      | 3       | 1360   | 3      | $\nu_{\text{C}_4\text{N}_9}, \nu_{\text{C}_5\text{C}_6}, \delta_{\text{C}_8\text{H}}$  |
| 14   |                                                                      | 1293       | 5       | 1265   | 3      | 1292     | 6       | 1264   | 3      | 1323      | 10      | 1293   | 4      | $\delta_{\text{C}_8\text{H}}$                                                          |
| 15   | 1173                                                                 | 1188       | 77      | 1162   | 62     | 1189     | 78      | 1162   | 63     | 1225      | 69      | 1197   | 56     | $\delta_{\text{C}_8\text{H}}$                                                          |
| 16   | 1100                                                                 | 1135       | 10      | 1110   | 15     | 1138     | 10      | 1111   | 13     | 1165      | 8       | 1139   | 12     | $\nu_{\text{N}_1\text{C}_2}, \delta_{\text{N}_1\text{H}}$                              |
| 17   |                                                                      | 1074       | 14      | 1048   | 18     | 1075     | 15      | 1048   | 18     | 1104      | 16      | 1079   | 16     | $\nu_{\text{C}_8\text{N}_9}, \delta_{\text{N}_9\text{H}}$                              |
| 18   | 1049                                                                 | 1063       | 42      | 1032   | 41     | 1062     | 42      | 1031   | 41     | 1110      | 28      | 1083   | 21     | $\nu_{\text{N}_1\text{C}_6}, \delta_{\text{C}_6\text{O}}$                              |
| 19   | 919                                                                  | 947        | 6       | 932    | 4      | 947      | 6       | 934    | 2      | 957       | 6       | 942    | 4      | $\delta_{\text{r}}$                                                                    |
| 20   | 906                                                                  | 935        | 3       | 911    | 3      | 934      | 3       | 910    | 3      | 953       | 3       | 935    | 3      | $\gamma_{\text{C}_2\text{H}}$                                                          |
| 21   | 877                                                                  | 902        | 9       | 887    | 7      | 901      | 9       | 886    | 7      | 911       | 11      | 899    | 6      | $\delta_{\text{R}}$                                                                    |
| 22   | 808                                                                  | 842        | 6       | 813    | 20     | 841      | 6       | 811    | 19     | 874       | 4       | 855    | 0      | $\gamma_{\text{C}_8\text{H}}$                                                          |
| 23   | 786                                                                  | 810        | 19      | 766    | 8      | 810      | 19      | 766    | 10     | 843       | 17      | 826    | 17     | $\gamma_{\text{C}_6\text{O}}, \tau_{\text{R}}, \tau_{\text{r}}$                        |
| 24   | 701                                                                  | 741        | 40      | 709    | 31     | 740      | 39      | 708    | 29     | 755       | 33      | 742    | 31     | $\gamma_{\text{N}_1\text{H}}, \gamma_{\text{C}_6\text{O}}$                             |
| 25   | 687                                                                  | 701        | 10      | 689    | 11     | 700      | 10      | 689    | 11     | 723       | 8       | 712    | 9      | $\nu_{\text{N}_3\text{C}_4}, \nu_{\text{N}_1\text{C}_6}$                               |
| 26   | 663                                                                  | 675        | 24      | 650    | 19     | 674      | 24      | 649    | 20     | 685       | 22      | 673    | 27     | $\tau_{\text{r}}, \gamma_{\text{N}_1\text{H}}$                                         |
| 27   | 624                                                                  | 658        | 6       | 635    | 13     | 657      | 6       | 634    | 14     | 665       | 15      | 652    | 12     | $\gamma_{\text{N}_1\text{H}}, \tau_{\text{r}}$                                         |

|    |     |     |     |     |    |     |     |     |    |     |     |     |     |                             |
|----|-----|-----|-----|-----|----|-----|-----|-----|----|-----|-----|-----|-----|-----------------------------|
| 28 | 581 | 607 | 8   | 599 | 7  | 608 | 8   | 600 | 7  | 619 | 8   | 611 | 7   | $\delta r$ , $\nu C_5C_6$   |
| 29 | 560 | 581 | 115 | 524 | 86 | 580 | 114 | 526 | 86 | 590 | 111 | 578 | 101 | $\gamma N_9H$               |
| 30 | 529 | 537 | 11  | 531 | 10 | 537 | 11  | 531 | 10 | 546 | 11  | 539 | 11  | $\delta R$ , $\delta C_6O$  |
| 31 | 510 | 539 | 5   | 501 | 79 | 538 | 5   | 501 | 79 | 548 | 4   | 540 | 5   | $\gamma N_9H$               |
| 32 |     | 509 | 2   | 503 | 2  | 510 | 2   | 503 | 2  | 519 | 2   | 512 | 1   | $\delta R$                  |
| 33 |     | 322 | 1   | 318 | 1  | 322 | 1   | 318 | 1  | 326 | 1   | 323 | 1   | $\delta C_6O$ , $\delta rR$ |
| 34 |     | 271 | 0   | 262 | 0  | 270 | 0   | 262 | 0  | 277 | 0   | 273 | 0   | $\tau rR$                   |
| 35 |     | 209 | 16  | 202 | 15 | 208 | 16  | 201 | 15 | 213 | 17  | 211 | 16  | $\tau rR$                   |
| 36 |     | 156 | 2   | 149 | 1  | 155 | 2   | 149 | 1  | 154 | 2   | 151 | 1   | $\tau rR$                   |

<sup>a</sup> From Ref.<sup>36</sup>.

<sup>b</sup> Abbreviations:  $\nu$  = stretching;  $\delta$  = in-plane bending;  $\gamma$  = out-of-plane bending;  $\tau$  = torsional; sciss = scissoring; rock = rocking; wagg = wagging; asym = asymmetric; sym = symmetric; R and r refer to the 6-membered ring and 5-membered ring, respectively.

**Table 5.** Experimental, harmonic and anharmonic vibrational frequencies ( $cm^{-1}$ ) and intensities for thymine molecule.

| Mode | Exp. | Calculated                |         |        |        |      |         |          |        |      |           |        |        | Assignment <sup>b</sup>                                  |
|------|------|---------------------------|---------|--------|--------|------|---------|----------|--------|------|-----------|--------|--------|----------------------------------------------------------|
|      |      | Argon matrix <sup>a</sup> |         |        | B3LYP  |      |         | B3LYP-D3 |        |      | B3LYP-DCP |        |        |                                                          |
|      |      | harm                      | I(harm) | anharm | I(anh) | harm | I(harm) | anharm   | I(anh) | harm | I(harm)   | anharm | I(anh) |                                                          |
| 1    | 3479 | 3640                      | 103     | 3473   | 86     | 3640 | 103     | 3472     | 85     | 3645 | 111       | 3472   | 72     | $\nu N_1H$                                               |
| 2    | 3432 | 3595                      | 67      | 3430   | 50     | 3596 | 67      | 3431     | 53     | 3600 | 69        | 3430   | 50     | $\nu N_3H$                                               |
| 3    |      | 3196                      | 4       | 3064   | 4      | 3194 | 4       | 3059     | 6      | 3244 | 2         | 3115   | 1      | $\nu C_6H$                                               |
| 4    | 2992 | 3111                      | 14      | 2964   | 7      | 3110 | 14      | 2963     | 10     | 3173 | 7         | 3029   | 6      | $\nu_{asym}CH_3$                                         |
| 5    | 2969 | 3089                      | 9       | 2945   | 12     | 3088 | 9       | 2943     | 12     | 3141 | 2         | 2997   | 4      | $\nu_{out-of-plane}CH_3$                                 |
| 6    | 2939 | 3030                      | 22      | 2937   | 18     | 3028 | 22      | 2934     | 18     | 3076 | 15        | 2969   | 11     | $\nu_{sym}CH_3$                                          |
| 7    | 1767 | 1795                      | 764     | 1767   | 499    | 1795 | 768     | 1768     | 492    | 1828 | 797       | 1794   | 222    | $\nu C_2O$ , $\nu C_2N_3$ , $\nu N_1C_2$                 |
| 8    | 1711 | 1748                      | 637     | 1718   | 382    | 1749 | 629     | 1719     | 449    | 1788 | 661       | 1752   | 438    | $\nu C_4O$ , $\nu N_3C_4$                                |
| 9    | 1668 | 1699                      | 39      | 1662   | 35     | 1700 | 38      | 1662     | 18     | 1759 | 2         | 1725   | 59     | $\nu C_5C_6$ , $\delta C_6H$ , $\nu C_4O$ , $\nu N_1C_6$ |
| 10   | 1472 | 1499                      | 79      | 1456   | 35     | 1499 | 76      | 1456     | 44     | 1540 | 126       | 1495   | 83     | $\nu C_6N_1$ , $\delta N_1H$ , $\delta_{sciss}CH_3$      |
| 11   | 1455 | 1488                      | 10      | 1452   | 4      | 1488 | 7       | 1450     | 4      | 1488 | 1         | 1451   | 1      | $\delta_{sciss}CH_3$                                     |
| 12   | 1431 | 1465                      | 7       | 1428   | 6      | 1464 | 7       | 1428     | 5      | 1464 | 10        | 1430   | 7      | $\gamma CH_3$                                            |

|    |      |      |     |      |     |      |     |      |    |      |     |      |    |                                                                                                                                       |
|----|------|------|-----|------|-----|------|-----|------|----|------|-----|------|----|---------------------------------------------------------------------------------------------------------------------------------------|
| 13 | 1405 | 1419 | 61  | 1386 | 5   | 1419 | 70  | 1384 | 30 | 1463 | 44  | 1433 | 32 | inv CH <sub>3</sub> , δN <sub>1</sub> H, νC <sub>2</sub> N <sub>3</sub>                                                               |
| 14 | 1388 | 1421 | 32  | 1388 | 140 | 1423 | 25  | 1389 | 97 | 1432 | 21  | 1402 | 17 | inv CH <sub>3</sub> , δN <sub>1</sub> H, νC <sub>2</sub> N <sub>3</sub>                                                               |
| 15 | 1367 | 1399 | 7   | 1365 | 4   | 1405 | 8   | 1367 | 5  | 1418 | 5   | 1386 | 7  | δN <sub>3</sub> H, δC <sub>6</sub> H                                                                                                  |
| 16 | 1357 | 1373 | 6   | 1343 | 9   | 1375 | 8   | 1344 | 5  | 1399 | 8   | 1370 | 4  | δC <sub>6</sub> H, δN <sub>3</sub> H                                                                                                  |
| 17 | 1220 | 1230 | 11  | 1198 | 12  | 1228 | 11  | 1196 | 13 | 1290 | 7   | 1258 | 11 | νC <sub>5</sub> -CH <sub>3</sub> , νN <sub>1</sub> C <sub>6</sub>                                                                     |
| 18 | 1183 | 1197 | 142 | 1173 | 66  | 1203 | 146 | 1174 | 81 | 1239 | 113 | 1211 | 62 | δC <sub>6</sub> H, δN <sub>1</sub> H, νN <sub>1</sub> C <sub>6</sub>                                                                  |
| 19 | 1139 | 1155 | 4   | 1127 | 5   | 1156 | 4   | 1126 | 5  | 1193 | 17  | 1170 | 11 | νN <sub>3</sub> C <sub>4</sub> , νN <sub>1</sub> C <sub>6</sub>                                                                       |
| 20 | 1046 | 1069 | 1   | 1043 | 1   | 1068 | 1   | 1043 | 1  | 1076 | 3   | 1053 | 3  | δ <sub>rock</sub> CH <sub>3</sub> , γ <sub>wagg</sub> C <sub>5</sub> -CH <sub>3</sub>                                                 |
| 21 | 1004 | 1022 | 2   | 1003 | 2   | 1024 | 2   | 1005 | 2  | 1031 | 3   | 1014 | 1  | δ <sub>rock</sub> CH <sub>3</sub> , δ ring                                                                                            |
| 22 | 959  | 965  | 13  | 947  | 12  | 969  | 13  | 948  | 12 | 987  | 12  | 964  | 9  | δ <sub>rock</sub> CH <sub>3</sub> , δN <sub>3</sub> H, νN <sub>1</sub> C <sub>2</sub> , νC <sub>2</sub> N <sub>3</sub>                |
| 23 | 889  | 911  | 16  | 889  | 9   | 910  | 16  | 886  | 5  | 931  | 11  | 911  | 8  | γ <sub>wagg</sub> C <sub>6</sub> H, γ ring                                                                                            |
| 24 | 799  | 804  | 5   | 794  | 5   | 805  | 6   | 794  | 4  | 821  | 6   | 807  | 6  | δ ring, νC <sub>5</sub> -CH <sub>3</sub> , νN <sub>1</sub> C <sub>2</sub>                                                             |
| 25 | 763  | 786  | 35  | 760  | 19  | 786  | 34  | 761  | 19 | 813  | 34  | 798  | 31 | γ <sub>wagg</sub> C <sub>4</sub> O, γ <sub>wagg</sub> C <sub>5</sub> -CH <sub>3</sub> , γ <sub>wagg</sub> N <sub>3</sub> H,<br>γ ring |
| 26 | 754  | 762  | 28  | 742  | 16  | 762  | 28  | 743  | 18 | 784  | 24  | 774  | 23 | γ <sub>wagg</sub> C <sub>2</sub> O, γ <sub>wagg</sub> N <sub>3</sub> H, γ <sub>wagg</sub> N <sub>1</sub> H, γ<br>ring                 |
| 27 | 727  | 734  | 5   | 722  | 4   | 736  | 5   | 722  | 4  | 767  | 5   | 755  | 4  | νC <sub>4</sub> C <sub>5</sub> , νC <sub>5</sub> -CH <sub>3</sub> , δ ring                                                            |
| 28 | 662  | 691  | 61  | 633  | 77  | 689  | 62  | 631  | 79 | 699  | 62  | 676  | 57 | γ <sub>wagg</sub> N <sub>3</sub> H, γ ring, γ <sub>wagg</sub> N <sub>1</sub> H,<br>γ <sub>wagg</sub> C <sub>2</sub> O                 |
| 29 | 601  | 606  | 1   | 601  | 1   | 610  | 1   | 604  | 1  | 618  | 1   | 613  | 1  | δC <sub>2</sub> O, δC <sub>4</sub> O, δC <sub>5</sub> -CH <sub>3</sub> , δ ring                                                       |
| 30 | 545  | 570  | 59  | 507  | 36  | 567  | 59  | 504  | 38 | 576  | 56  | 566  | 54 | γ <sub>wagg</sub> N <sub>1</sub> H, γ <sub>wagg</sub> N <sub>3</sub> H, γ <sub>wagg</sub> C <sub>4</sub> O, γ<br>ring                 |
| 31 | 540  | 547  | 7   | 539  | 7   | 548  | 8   | 539  | 7  | 560  | 8   | 554  | 7  | δ ring, δC <sub>4</sub> O                                                                                                             |
| 32 | 455  | 461  | 19  | 458  | 19  | 463  | 19  | 459  | 18 | 472  | 17  | 461  | 16 | δ ring                                                                                                                                |
| 33 |      | 406  | 17  | 389  | 21  | 405  | 17  | 388  | 22 | 416  | 17  | 410  | 16 | γ ring                                                                                                                                |
| 34 |      | 389  | 20  | 387  | 19  | 391  | 20  | 389  | 19 | 398  | 20  | 397  | 19 | δC <sub>2</sub> O, δC <sub>4</sub> O, νN <sub>3</sub> C <sub>4</sub>                                                                  |
| 35 |      | 303  | 0   | 293  | 0   | 301  | 0   | 292  | 0  | 308  | 1   | 310  | 1  | γ <sub>wagg</sub> C <sub>5</sub> -CH <sub>3</sub> , γ ring                                                                            |
| 36 |      | 278  | 3   | 279  | 3   | 283  | 3   | 282  | 2  | 287  | 3   | 292  | 2  | δC <sub>5</sub> -CH <sub>3</sub> , δC <sub>4</sub> O                                                                                  |
| 37 |      | 159  | 1   | 151  | 1   | 158  | 1   | 150  | 1  | 158  | 2   | 158  | 2  | γ ring                                                                                                                                |
| 38 |      | 153  | 1   | 148  | 0   | 150  | 1   | 151  | 1  | 166  | 0   | 172  | 0  | τ CH <sub>3</sub>                                                                                                                     |
| 39 |      | 113  | 0   | 110  | 0   | 113  | 0   | 110  | 0  | 114  | 0   | 113  | 0  | γ ring                                                                                                                                |

<sup>a</sup> From Ref.<sup>39</sup>.

<sup>b</sup> Abbreviations: ν = stretching; δ = in-plane bending; γ = out-of-plane bending; τ = torsional; sciss = scissoring; rock = rocking; wagg = wagging; inv= inversion; asym = asymmetric; sym = symmetric.



**Table 6.** Deviations between computed anharmonic vibrational frequencies (in  $\text{cm}^{-1}$ ) of nucleobases and experimental data<sup>a</sup>.

|           | adenine          | cytosine | uracil | hypoxanthine | thymine | all                |
|-----------|------------------|----------|--------|--------------|---------|--------------------|
|           | MAE <sup>b</sup> |          |        |              |         | (weighted average) |
| B3LYP     | 12.0             | 11.2     | 11.8   | 11.3         | 9.3     | 11.1               |
| B3LYP-D3  | 12.3             | 11.0     | 12.3   | 11.2         | 9.9     | 11.4               |
| B3LYP-DCP | 24.0             | 18.4     | 18.7   | 31.9         | 20.3    | 22.6               |
|           | MIN <sup>c</sup> |          |        |              |         | (minimum value)    |
| B3LYP     | -34              | -23      | -32    | -36          | -38     | -38                |
| B3LYP-D3  | -35              | -25      | -34    | -34          | -41     | -41                |
| B3LYP-DCP | -80              | -14      | -17    | -6           | -7      | -80                |
|           | MAX <sup>d</sup> |          |        |              |         | (maximum value)    |
| B3LYP     | 26               | 27       | 18     | 26           | 7       | 27                 |
| B3LYP-D3  | 25               | 28       | 16     | 25           | 8       | 28                 |
| B3LYP-DCP | 55               | 46       | 72     | 66           | 57      | 72                 |

<sup>a</sup> From Ref.<sup>31,32,34-36,39,145,147</sup>.

<sup>b</sup> Mean absolute error to the experimental results.

<sup>c</sup> Minimum negative deviation to the experimental results.

<sup>d</sup> Maximum positive deviation to the experimental results.

**Table 7.** Deviations of harmonic and anharmonic vibrational frequencies (in  $\text{cm}^{-1}$ ) of nucleobases computed with B3LYP-D3 and B3LYP-DCP respect to the B3LYP method.

|                     | MAE <sup>a</sup>      |                         |                        | MIN <sup>b</sup>      |                         |                        | MAX <sup>c</sup>      |                         |                        |
|---------------------|-----------------------|-------------------------|------------------------|-----------------------|-------------------------|------------------------|-----------------------|-------------------------|------------------------|
|                     | $\Delta\text{harm}^d$ | $\Delta\text{anharm}^e$ | $\Delta\text{GVPT2}^f$ | $\Delta\text{harm}^d$ | $\Delta\text{anharm}^e$ | $\Delta\text{GVPT2}^f$ | $\Delta\text{harm}^d$ | $\Delta\text{anharm}^e$ | $\Delta\text{GVPT2}^f$ |
| <b>adenine</b>      |                       |                         |                        |                       |                         |                        |                       |                         |                        |
| D3                  | 1.7                   | 2.2                     | 2                      | -14                   | -17                     | -19                    | 15                    | 18                      | 20                     |
| DCP                 | 18.7                  | 29.1                    | 6.8                    | -103                  | -102                    | -23                    | 53                    | 62                      | 42                     |
| <b>cytosine</b>     |                       |                         |                        |                       |                         |                        |                       |                         |                        |
| D3                  | 1.4                   | 2.4                     | 2.3                    | -4                    | -7                      | -6                     | 7                     | 17                      | 14                     |
| DCP                 | 21.2                  | 24.0                    | 4.8                    | -5                    | -1                      | -8                     | 52                    | 62                      | 24                     |
| <b>uracil</b>       |                       |                         |                        |                       |                         |                        |                       |                         |                        |
| D3                  | 1.3                   | 1.5                     | 1.2                    | -2                    | -3                      | -6                     | 4                     | 10                      | 8                      |
| DCP                 | 22.8                  | 24.7                    | 6.1                    | -2                    | 1                       | -13                    | 82                    | 75                      | 37                     |
| <b>hypoxanthine</b> |                       |                         |                        |                       |                         |                        |                       |                         |                        |
| D3                  | 0.8                   | 1.0                     | 0.7                    | -2                    | -4                      | -2                     | 3                     | 3                       | 3                      |
| DCP                 | 22.8                  | 27.5                    | 6.2                    | -2                    | 1                       | -8                     | 46                    | 60                      | 44                     |
| <b>thymine</b>      |                       |                         |                        |                       |                         |                        |                       |                         |                        |
| D3                  | 1.7                   | 1.4                     | 1.4                    | -3                    | -5                      | -6                     | 6                     | 4                       | 6                      |
| DCP                 | 22.9                  | 26.1                    | 6.3                    | -1                    | -2                      | -14                    | 61                    | 65                      | 52                     |
| <b>all</b>          |                       |                         |                        |                       |                         |                        |                       |                         |                        |
| D3                  | 1.4                   | 1.7                     | 1.5                    | -14                   | -17                     | -19                    | 15                    | 18                      | 20                     |
| DCP                 | 21.6                  | 26.4                    | 6.1                    | -103                  | -102                    | -23                    | 82                    | 75                      | 52                     |

<sup>a</sup> Mean absolute error.

<sup>b</sup> Minimum negative deviation.

<sup>c</sup> Maximum positive deviation.

<sup>d</sup> Deviation between harmonic frequencies.

<sup>e</sup> Deviation between anharmonic frequencies.

<sup>f</sup> Deviation of anharmonic shift for the selected method respect to B3LYP method.

**Table 8.** Counterpoise-corrected binding energy ( $\Delta E_{\text{bind}}$ ) of hydrogen-bonded and stacked dimer structures in kcal mol<sup>-1</sup> compared to reference values.

| $\Delta E_{\text{bind}}$               | Ref   | Optimized geometry |
|----------------------------------------|-------|--------------------|
| <b>Uracil-Uracil hydrogen-bonded</b>   |       |                    |
| B3LYP                                  | -11.4 | -13.5              |
| B3LYP-D3                               | -14.9 | -16.7              |
| B3LYP-DCP                              | -13.8 | -15.8              |
| Ref a (CBS)                            | -15.7 |                    |
| <b>Uracil-Uracil stacked</b>           |       |                    |
| B3LYP-D3                               | -5.8  | -9.3               |
| B3LYP-DCP                              | -3.9  | -7.8               |
| Ref a (CBS)                            | -7.9  |                    |
| <b>Adenine-Adenine hydrogen-bonded</b> |       |                    |
| B3LYP                                  | -9.3  | -10.2              |
| B3LYP-D3                               | -13.1 | -13.9              |
| B3LYP-DCP                              | -11.8 | -12.9              |
| Ref b (CBS)                            | -13.2 |                    |
| <b>Adenine-Adenine stacked</b>         |       |                    |
| B3LYP-D3                               | -5.6  | -7.3               |
| B3LYP-DCP                              | -4.5  | -6.6               |
| Ref c (CBS)                            | -8.3  |                    |
| <b>Adenine-Naphthalene stacked</b>     |       |                    |
| B3LYP-D3                               | -2.3  | -7.9               |
| B3LYP-DCP                              | +3.6  | -7.1               |
| Ref d (CBS)                            | -8.5  |                    |

<sup>a</sup> Ref.<sup>137</sup>

<sup>b</sup> Ref.<sup>138</sup>

<sup>c</sup> Ref.<sup>139</sup>

<sup>d</sup> Ref.<sup>140</sup>

**Table 9.** Rotational constants in  $\text{cm}^{-1}$  of optimized dimer structures, computed with B3LYP, B3LYP-D3 and B3LYP-DCP methods, compared with reference structures.

|                                        | B3LYP    | B3LYP-D3 | B3LYP-DCP | Ref <sup>b</sup> |
|----------------------------------------|----------|----------|-----------|------------------|
| <b>Uracil-Uracil hydrogen-bonded</b>   |          |          |           |                  |
| A                                      | 0.046747 | 0.046663 | 0.047372  | 0.046977         |
| B                                      | 0.007470 | 0.007558 | 0.007619  | 0.007910         |
| C                                      | 0.006441 | 0.006505 | 0.006563  | 0.006770         |
| MAE <sup>a</sup> , %                   | 3.6      | 3.0      | 2.5       |                  |
| <b>Uracil-Uracil stacked</b>           |          |          |           |                  |
| A                                      |          | 0.022792 | 0.023083  | 0.022812         |
| B                                      |          | 0.018301 | 0.018077  | 0.020433         |
| C                                      |          | 0.017017 | 0.017235  | 0.019037         |
| MAE <sup>a</sup> , %                   |          | 7.0      | 7.4       |                  |
| <b>Adenine-Adenine hydrogen-bonded</b> |          |          |           |                  |
| A                                      | 0.038408 | 0.038394 | 0.038869  | 0.038507         |
| B                                      | 0.004313 | 0.004369 | 0.004408  | 0.004399         |
| C                                      | 0.003878 | 0.003923 | 0.003959  | 0.003948         |
| MAE <sup>a</sup> , %                   | 1.3      | 0.5      | 0.5       |                  |
| <b>Adenine-Adenine stacked</b>         |          |          |           |                  |
| A                                      |          | 0.016851 | 0.017303  | 0.015827         |
| B                                      |          | 0.013524 | 0.013326  | 0.014517         |
| C                                      |          | 0.011780 | 0.011765  | 0.012261         |
| MAE <sup>a</sup> , %                   |          | 5.7      | 7.2       |                  |
| <b>Adenine-Naphthalene stacked</b>     |          |          |           |                  |
| A                                      |          | 0.019729 | 0.019946  | 0.020394         |
| B                                      |          | 0.011048 | 0.011366  | 0.011999         |
| C                                      |          | 0.010480 | 0.010740  | 0.011592         |
| MAE <sup>a</sup> , %                   |          | 6.9      | 4.9       |                  |
| <b>All</b>                             |          |          |           |                  |
| AVERAGE MAE <sup>a</sup> , %           | 2.5      | 4.7      | 4.5       |                  |

<sup>a</sup> Mean absolute error.

<sup>b</sup> Ref.<sup>137-140</sup>

**Table 10.** Structural parameters of optimized hydrogen-bonded and stacked dimer structures compared to reference structures<sup>137-140</sup>.

|                                        | B3LYP     | B3LYP-D3  | B3LYP-DCP | Ref       | Error, % B3LYP | Error, % B3LYP-D3 | Error, % B3LYP-DCP |
|----------------------------------------|-----------|-----------|-----------|-----------|----------------|-------------------|--------------------|
| <b>Uracil-Uracil hydrogen-bonded</b>   |           |           |           |           |                |                   |                    |
| r N3-O'2                               | 2.85978   | 2.82872   | 2.82865   | 2.68192   | -6.6           | -5.5              | -5.5               |
| r O4-N'1                               | 2.7975    | 2.7743    | 2.76913   | 2.62376   | -6.6           | -5.7              | -5.5               |
| r H3-O'2                               | 1.82963   | 1.79574   | 1.79794   | 1.65586   | -10.5          | -8.4              | -8.6               |
| r O4-H'1                               | 1.76572   | 1.74032   | 1.73641   | 1.59862   | -10.5          | -8.9              | -8.6               |
| $\alpha$ N3-H3-O'2                     | 172.59961 | 173.77026 | 173.09168 | 173.86721 | 0.7            | 0.1               | 0.4                |
| $\alpha$ H3-O'2-C'2                    | 126.714   | 125.55512 | 125.97066 | 125.2688  | -1.2           | -0.2              | -0.6               |
| $\alpha$ C4-O4-H'1                     | 128.91291 | 127.49196 | 127.72335 | 127.42064 | -1.2           | -0.1              | -0.2               |
| $\alpha$ O4-H'1-N'1                    | 175.2903  | 176.39592 | 175.80687 | 176.12931 | 0.5            | -0.2              | 0.2                |
| <b>Uracil-Uracil stacked</b>           |           |           |           |           |                |                   |                    |
| r N3-C'2                               |           | 3.04174   | 3.12506   | 2.77937   |                | -9.4              | -12.4              |
| r C2-N'3                               |           | 3.04174   | 3.12506   | 2.77937   |                | -9.4              | -12.4              |
| r N1-C'4                               |           | 3.40125   | 3.38928   | 3.08074   |                | -10.4             | -10.0              |
| r C4-N'1                               |           | 3.40125   | 3.38928   | 3.08074   |                | -10.4             | -10.0              |
| r C5-C'6                               |           | 3.87457   | 3.75362   | 3.47734   |                | -11.4             | -7.9               |
| r C6-C'5                               |           | 3.87457   | 3.75362   | 3.47735   |                | -11.4             | -7.9               |
| <b>Adenine-Adenine hydrogen-bonded</b> |           |           |           |           |                |                   |                    |
| r H <sub>am</sub> -N'1                 | 1.97256   | 1.91889   | 1.93355   | 1.92463   | -2.5           | 0.3               | -0.5               |
| r N6-N'1                               | 3.00103   | 2.9498    | 2.96206   | 2.94839   | -1.8           | 0.0               | -0.5               |
| r N1-H' <sub>am</sub>                  | 1.97255   | 1.91889   | 1.93355   | 1.92297   | -2.6           | 0.2               | -0.6               |
| r N1-N'6                               | 3.00103   | 2.9498    | 2.96206   | 2.9466    | -1.8           | -0.1              | -0.5               |
| $\alpha$ N6-H <sub>am</sub> -N'1       | 178.78511 | 178.53519 | 177.83965 | 178.17496 | -0.3           | -0.2              | 0.2                |
| $\alpha$ H <sub>am</sub> -N'1-C'6      | 119.96032 | 120.1782  | 120.40863 | 120.29665 | 0.3            | 0.1               | -0.1               |
| $\alpha$ N1-H' <sub>am</sub> -N'6      | 178.78511 | 178.53511 | 177.83968 | 178.16992 | -0.3           | -0.2              | 0.2                |
| $\alpha$ C6-N1-H' <sub>am</sub>        | 119.96037 | 120.17823 | 120.4088  | 120.34323 | 0.3            | 0.1               | -0.1               |
| <b>Adenine-Adenine stacked</b>         |           |           |           |           |                |                   |                    |
| r N1-C'8                               |           | 3.5519    | 3.51297   | 3.32667   |                | -6.8              | -5.6               |
| r C2-N'7                               |           | 3.39262   | 3.35714   | 3.30988   |                | -2.5              | -1.4               |
| r N3-N'7                               |           | 3.69738   | 3.76167   | 3.53667   |                | -4.5              | -6.4               |
| r C4-C'5                               |           | 3.58781   | 3.63799   | 3.42621   |                | -4.7              | -6.2               |
| r C5-C'4                               |           | 3.62091   | 3.63801   | 3.42621   |                | -5.7              | -6.2               |
| r C6-N'9                               |           | 3.66363   | 3.65277   | 3.40615   |                | -7.6              | -7.2               |
| r N6-H'9                               |           | 3.82444   | 3.78039   | 3.4561    |                | -10.7             | -9.4               |
| r N7-C'2                               |           | 3.29564   | 3.35714   | 3.30988   |                | 0.4               | -1.4               |
| r N7-N'3                               |           | 3.74249   | 3.76169   | 3.53667   |                | -5.8              | -6.4               |
| r C8-N'1                               |           | 3.41169   | 3.51296   | 3.32667   |                | -2.6              | -5.6               |
| r N9-C'6                               |           | 3.55295   | 3.65275   | 3.40615   |                | -4.3              | -7.2               |
| r H9-N'6                               |           | 3.50834   | 3.78037   | 3.4561    |                | -1.5              | -9.4               |
| <b>Adenine-Naphthalene stacked</b>     |           |           |           |           |                |                   |                    |
| r N1-C'3                               |           | 3.65537   | 3.54329   | 3.23751   |                | -12.9             | -9.4               |
| r C2-C'4                               |           | 3.53176   | 3.50262   | 3.21905   |                | -9.7              | -8.8               |
| r N3-C'10                              |           | 3.53101   | 3.55512   | 3.28405   |                | -7.5              | -8.3               |
| r C4-C'10                              |           | 3.29891   | 3.29056   | 2.98317   |                | -10.6             | -10.3              |
| r C5-C'9                               |           | 3.79718   | 3.69504   | 3.37665   |                | -12.5             | -9.4               |
| r C5-C'1                               |           | 3.7135    | 3.60016   | 3.30096   |                | -12.5             | -9.1               |

|          |         |         |         |       |       |
|----------|---------|---------|---------|-------|-------|
| r C6-C'2 | 3.73934 | 3.58268 | 3.26696 | -14.5 | -9.7  |
| r N6-C'2 | 3.97407 | 3.77379 | 3.39036 | -17.2 | -11.3 |
| r N7-C'1 | 3.57398 | 3.47089 | 3.1805  | -12.4 | -9.1  |
| r N7-C'9 | 3.69806 | 3.60085 | 3.31383 | -11.6 | -8.7  |
| r C8-C'8 | 3.40076 | 3.38853 | 3.12415 | -8.9  | -8.5  |
| r N9-C'7 | 3.62581 | 3.67613 | 3.42655 | -5.8  | -7.3  |
| r N9-C'6 | 3.5546  | 3.60922 | 3.36418 | -5.7  | -7.3  |
| r N9-C'5 | 3.40637 | 3.45271 | 3.23149 | -5.4  | -6.8  |

---

**Legend:** Atoms of monomer 2 are indexed with apostrophe; r = distance between atoms in Å;  $\alpha$  = angle between atoms in degree units. Uracil dimers: O2 = oxygen bonded to C2; O4 = oxygen bonded to C4; H3 = hydrogen bonded to N3; H1 = hydrogen bonded to N1. Adenine dimers: Ham = amino group hydrogen atom.

**Table 11.** Mean absolute errors (MAE) of structural parameters of optimized dimer structures, computed with B3LYP, B3LYP-D3 and B3LYP-DCP methods, compared to reference structures<sup>137-140</sup>.

|                                        | MAE, % B3LYP | MAE, % B3LYP-D3 | MAE, % B3LYP-DCP |
|----------------------------------------|--------------|-----------------|------------------|
| <b>Uracil-Uracil hydrogen-bonded</b>   | 4.7          | 3.6             | 3.7              |
| <b>Uracil-Uracil stacked</b>           |              | 10.4            | 10.1             |
| <b>Adenine-Adenine hydrogen-bonded</b> | 1.2          | 0.2             | 0.3              |
| <b>Adenine-Adenine stacked</b>         |              | 4.8             | 6.0              |
| <b>Adenine-Naphthalene stacked</b>     |              | 10.5            | 8.9              |

**Table 12.** Anharmonic vibrational frequencies ( $\text{cm}^{-1}$ ) of hydrogen-bonded uracil dimer, computed using B3LYP, B3LYP-D3 and B3LYP-DCP approaches, and corresponding shifts respect to the isolated molecule ( $\Delta\text{hb}$ ).

| Mode | B3LYP  |                       | B3LYP-D3 |                       | B3LYP-DCP |                       | Assignment <sup>a</sup>                                              |
|------|--------|-----------------------|----------|-----------------------|-----------|-----------------------|----------------------------------------------------------------------|
|      | anharm | $\Delta\text{hb}$     | anharm   | $\Delta\text{hb}$     | anharm    | $\Delta\text{hb}$     |                                                                      |
| 1    | 3473   | 0.2                   | 3472     | -1.3                  | 3473      | -1.5                  | vN1H (M1)                                                            |
| 2    | 3429   | 2.2                   | 3427     | -2.9                  | 3432      | 3.1                   | vN3H (M2)                                                            |
| 3    | 3111   | 0.2                   | 3098     | -10.2                 | 3163      | 1.5                   | vC5H (M1)                                                            |
| 4    | 3116   | 5.6                   | 3117     | 8.0                   | 3163      | 0.8                   | vC5H (M2)                                                            |
| 5    | 3002   | <b>-424.6, -470.4</b> | 2926     | <b>-503.1, -546.4</b> | 2947      | <b>-482.0, -527.5</b> | vN3H (M1), vN1H (M2)                                                 |
| 6    | 3068   | 5.7                   | 3066     | 6.6                   | 3120      | 1.9                   | vC6H (M1)                                                            |
| 7    | 3072   | 9.6                   | 3072     | 12.4                  | 3127      | 9.2                   | vC6H (M2)                                                            |
| 8    | 2897   | <b>-530.0, -575.8</b> | 2870     | <b>-559.7, -546.4</b> | 2880      | <b>-549.4, -594.9</b> | vN3H (M1), vN1H (M2)                                                 |
| 9    | 1782   | 11.0                  | 1783     | 13.5                  | 1815      | 13.5                  | vC2=O (M1)                                                           |
| 10   | 1743   | -6.4                  | 1746     | -2.7                  | 1759      | -14.0                 | vC2=O, vC4=O, v ring, $\delta\text{N1H}$ (M2)                        |
| 11   | 1700   | <b>-49.9</b>          | 1699     | <b>-49.4</b>          | 1735      | <b>-38.4</b>          | vC2=O, vC4=O, $\delta\text{NH}$ (M2)                                 |
| 12   | 1679   | <b>-70.8</b>          | 1676     | <b>-72.4</b>          | 1715      | <b>-58.1</b>          | vC4=O, v ring, $\delta\text{N3H}$ (M1)                               |
| 13   | 1635   | -4.2                  | 1635     | -3.8                  | 1695      | 0.9                   | vC5=C6 (M2)                                                          |
| 14   | 1625   | -14.1                 | 1624     | -14.8                 | 1685      | -8.7                  | vC5=C6 (M1)                                                          |
| 15   | 1511   | <b>48.6</b>           | 1515     | <b>52.3</b>           | 1535      | <b>42.3</b>           | $\delta\text{N1H}$ (M2)                                              |
| 16   | 1474   | <b>102.0</b>          | 1475     | <b>104.9</b>          | 1514      | <b>95.4</b>           | v ring, $\delta\text{N1H}$ , $\delta\text{N3H}$ (M1)                 |
| 17   | 1434   |                       | 1445     |                       | 1457      |                       | $\delta\text{N3H}$ (M1)                                              |
| 18   | 1404   |                       | 1403     |                       | 1453      |                       | v ring, $\delta\text{N1H}$ , $\delta\text{CH}$ (M2)                  |
| 19   | 1390   |                       | 1390     |                       | 1429      |                       | v ring, $\delta\text{N1H}$ , $\delta\text{CH}$ (M1)                  |
| 20   | 1387   | 1.3                   | 1382     | -3.6                  | 1409      | 12.9                  | $\delta\text{N3H} + \delta\text{CH}$ (M2)                            |
| 21   | 1360   | 11.1                  | 1356     | 6.6                   | 1381      | 19.1                  | $\delta\text{N3H}$ (M2), v ring, $\delta\text{CH}$ (M1)              |
| 22   | 1356   | 6.9                   | 1352     | 1.9                   | 1371      | 8.9                   | $\delta\text{N3H}$ , v ring (M2), $\delta\text{CH}$ (M1)             |
| 23   | 1231   |                       | 1232     |                       | 1248      |                       | $\delta\text{N1H}$ , v ring, $\delta\text{CH}$ (M2)                  |
| 24   | 1202   |                       | 1204     |                       | 1262      |                       | v ring (M1)                                                          |
| 25   | 1181   | -21.4                 | 1183     | -21.8                 | 1239      | -2.9                  | v ring, $\delta\text{N3H}$ , $\delta\text{CH}$ (M2)                  |
| 26   | 1188   | 20.9                  | 1187     | 21.9                  | 1211      | 7.4                   | $\delta\text{N1H}$ , v ring, $\delta\text{CH}$ (M1)                  |
| 27   | 1076   |                       | 1074     |                       | 1101      |                       | $\delta\text{CH}$ (M2)                                               |
| 28   | 1074   | 10.3                  | 1073     | 11.5                  | 1096      | 5.7                   | $\delta\text{CH}$ , $\delta\text{N1H}$ (M1)                          |
| 29   | 980    | 2.4                   | 981      | 5.0                   | 1012      | 33.3                  | $\delta$ ring (M1, M2)                                               |
| 30   | 978    | 0.4                   | 978      | 2.2                   | 997       | 18.4                  | $\delta$ ring (M2, M1)                                               |
| 31   | 917    |                       | 880      |                       | 993       |                       | $\gamma\text{CH}$ , $\gamma\text{N1H}$ (M2), $\gamma\text{N3H}$ (M1) |
| 32   | 958    | -18.8                 | 964      | -11.4                 | 984       | 5.1                   | $\delta$ ring (M1)                                                   |
| 33   | 944    | -4.8                  | 943      | -5.1                  | 985       | 4.2                   | $\gamma\text{CH}$ (M1)                                               |
| 34   | 957    | 14.3                  | 957      | 10.3                  | 981       | 8.3                   | v ring, $\delta\text{N3H}$ , $\delta\text{CH}$ (M2)                  |
| 35   | 797    |                       | 832      |                       | 922       |                       | $\gamma\text{N3H}$ (M1), $\gamma\text{N1H}$ , $\gamma\text{CH}$ (M2) |
| 36   | 728    |                       | 738      |                       | 877       |                       | $\gamma\text{N1H}$ , $\gamma\text{CH}$ (M2), $\gamma\text{N3H}$ (M1) |
| 37   | 800    | -3.0                  | 796      | -6.3                  | 833       | 3.2                   | $\gamma\text{C4=O}$ , $\gamma\text{CH}$ (M1)                         |
| 38   | 811    | 7.7                   | 809      | 6.2                   | 834       | 4.4                   | $\gamma\text{C4=O}$ , $\gamma\text{CH}$ (M2)                         |
| 39   | 768    | 14.5                  | 767      | 15.2                  | 791       | 11.0                  | ring breathing (M1, M2)                                              |
| 40   | 764    | 10.4                  | 763      | 11.4                  | 788       | 7.7                   | ring breathing (M1, M2)                                              |
| 41   | 740    | -5.7                  | 740      | -5.1                  | 788       | 10.1                  | $\gamma\text{C2=O}$ (M2)                                             |
| 42   | 729    | -16.7                 | 729      | -16.1                 | 776       | -1.9                  | $\gamma\text{C2=O}$ (M1)                                             |
| 43   | 713    | -0.3                  | 711      | -1.9                  | 737       | 5.5                   | $\gamma\text{CH}$ (M1)                                               |
| 44   | 711    |                       | 708      |                       | 730       |                       | $\gamma$ ring (M2)                                                   |
| 45   | 645    | 2.6                   | 634      | -6.6                  | 685       | 6.1                   | $\gamma\text{N3H}$ (M2)                                              |

|    |     |              |     |              |     |              |                                                      |
|----|-----|--------------|-----|--------------|-----|--------------|------------------------------------------------------|
| 46 | 504 | -25.2        | 536 | 8.3          | 599 | 21.9         | $\gamma$ N1H (M1)                                    |
| 47 | 570 | 20.4         | 572 | 12.3         | 586 | 22.7         | $\delta$ ring (M2)                                   |
| 48 | 556 | 21.1         | 558 | 23.0         | 572 | 24.0         | $\delta$ C=O (M1)                                    |
| 49 | 552 | 36.8         | 551 | 35.1         | 568 | 43.7         | $\delta$ ring (M1, M2)                               |
| 50 | 519 | 3.9          | 520 | 4.0          | 530 | 5.7          | $\delta$ ring (M2)                                   |
| 51 | 543 | <b>156.1</b> | 543 | <b>155.8</b> | 558 | <b>162.1</b> | $\delta$ C=O, $\delta$ ring (M2), $\delta$ ring (M1) |
| 52 | 527 | <b>140.0</b> | 527 | <b>139.9</b> | 539 | <b>143.2</b> | $\delta$ C=O, $\delta$ ring (M1), $\delta$ ring (M2) |
| 53 | 402 | 11.3         | 400 | 10.3         | 422 | 14.6         | $\tau$ (M2)                                          |
| 54 | 377 | -13.6        | 380 | -9.5         | 422 | 15.1         | $\tau$ (M1)                                          |
| 55 | 411 |              | 416 |              | 425 |              | $\delta$ C=O (M1, M2)                                |
| 56 | 396 |              | 399 |              | 407 |              | $\delta$ C=O (M1, M2)                                |
| 57 | 170 |              | 169 |              | 190 |              | $\tau$ (M1, M2)                                      |
| 58 | 159 |              | 163 |              | 178 |              | $\tau$ (M1, M2)                                      |
| 59 | 152 | -11.4        | 152 | -10.2        | 170 | 1.7          | $\tau$ (M1, M2)                                      |
| 60 | 145 | -2.2         | 148 | 1.5          | 164 | 12.1         | $\tau$ (M1, M2)                                      |
| 61 | 130 |              | 135 |              | 141 |              | intermolecular mode                                  |
| 62 | 83  |              | 86  |              | 85  |              | intermolecular mode                                  |
| 63 | 48  |              | 53  |              | 72  |              | $\tau$ (M1, M2)                                      |
| 64 | 62  |              | 62  |              | 69  |              | intermolecular mode                                  |
| 65 | 14  |              | 9   |              | 25  |              | $\tau$ (M1, M2)                                      |
| 66 |     |              |     |              | 21  |              | $\tau$ (M1, M2)                                      |

<sup>a</sup> Abbreviations:  $\nu$  = stretching;  $\delta$  = in-plane bending;  $\gamma$  = out-of-plane bending;  $\tau$  = torsional; sciss = scissoring; rock = rocking; wagg = wagging; asym = asymmetric; sym = symmetric; M1 = Monomer 1; M2 = Monomer 2.

**Table 13.** Anharmonic vibrational frequencies ( $\text{cm}^{-1}$ ) of stacked uracil dimer, computed using B3LYP-D3 and B3LYP-DCP approaches, and corresponding shifts respect to the isolated molecule ( $\Delta$ stacked).

| Mode | B3LYP-D3 |                  | B3LYP-DCP |                  | Assignment <sup>a</sup>                         |
|------|----------|------------------|-----------|------------------|-------------------------------------------------|
|      | anharm   | $\Delta$ stacked | anharm    | $\Delta$ stacked |                                                 |
| 1    | 3362     | <b>-111.1</b>    | 3465      | -9.6             | $\nu$ N1H (M1, M2)                              |
| 2    | 3374     | <b>-98.5</b>     | 3465      | -9.5             | $\nu$ N1H (M1, M2)                              |
| 3    | 3394     | -35.7            | 3401      | -28.3            | $\nu$ N3H (M1, M2)                              |
| 4    | 3396     | -33.8            | 3400      | -29.3            | $\nu$ N3H(M1, M2)                               |
| 5    | 3113     | 3.9              | 3163      | 0.7              | $\nu$ C5H (M1, M2)                              |
| 6    | 3113     | 4.0              | 3162      | 0.5              | $\nu$ C5H (M1, M2)                              |
| 7    | 3068     | 8.7              | 3125      | 6.8              | $\nu$ C6H (M1, M2)                              |
| 8    | 3068     | 8.6              | 3125      | 7.1              | $\nu$ C6H (M1, M2)                              |
| 9    | 1763     | -7.1             | 1803      | 1.7              | $\nu$ C2=O (M1, M2)                             |
| 10   | 1762     | -7.9             | 1797      | -4.2             | $\nu$ C2=O (M1, M2)                             |
| 11   | 1727     | -21.6            | 1745      | -27.9            | $\nu$ C4=O (M1, M2)                             |
| 12   | 1689     | <b>-59.3</b>     | 1734      | -39.2            | $\nu$ C4=O (M1, M2)                             |
| 13   | 1634     | -4.0             | 1694      | 0.2              | $\nu$ C5=C6 (M1, M2)                            |
| 14   | 1635     | -3.3             | 1692      | -2.1             | $\nu$ C5=C6 (M1, M2)                            |
| 15   | 1474     | 11.4             | 1503      | 10.7             | $\nu$ ring, $\delta$ N1H (M1, M2)               |
| 16   | 1478     | 15.5             | 1501      | 8.6              | $\nu$ ring, $\delta$ N1H (M1, M2)               |
| 17   | 1385     | -0.4             | 1401      | 5.1              | $\nu$ ring, $\delta$ N3H, $\delta$ CH (M1, M2)  |
| 18   | 1386     | 0.0              | 1399      | 3.7              | $\nu$ ring, $\delta$ N3H, $\delta$ CH (M1, M2)  |
| 19   | 1384     | 13.4             | 1425      | 6.8              | $\nu$ ring, $\delta$ N1H, $\delta$ N3H (M1, M2) |
| 20   | 1376     | 5.7              | 1420      | 1.3              | $\nu$ ring, $\delta$ N1H, $\delta$ N3H (M1, M2) |



|    |      |              |      |      |                                            |
|----|------|--------------|------|------|--------------------------------------------|
| 21 | 1358 | 7.9          | 1371 | 9.5  | v ring, $\delta$ NH, $\delta$ CH (M1, M2)  |
| 22 | 1347 | -2.5         | 1371 | 9.1  | v ring, $\delta$ NH, $\delta$ CH (M1, M2)  |
| 23 | 1211 | 6.4          | 1245 | 3.1  | v ring, $\delta$ CH, $\delta$ NH (M1, M2)  |
| 24 | 1211 | 6.7          | 1243 | 1.6  | v ring, $\delta$ CH, $\delta$ NH (M1, M2)  |
| 25 | 1170 | 4.4          | 1211 | 8.2  | v ring, $\delta$ NH, $\delta$ CH (M1, M2)  |
| 26 | 1170 | 5.2          | 1208 | 4.5  | v ring, $\delta$ NH, $\delta$ CH (M1, M2)  |
| 27 | 1073 | 10.9         | 1093 | 2.1  | v ring, $\delta$ CH, $\delta$ N1H (M1, M2) |
| 28 | 1073 | 11.5         | 1093 | 2.5  | v ring, $\delta$ CH, $\delta$ N1H (M1, M2) |
| 29 | 985  | 9.6          | 987  | 7.9  | $\delta$ ring (M1, M2)                     |
| 30 | 986  | 10.0         | 985  | 5.9  | $\delta$ ring (M1, M2)                     |
| 31 | 948  | -0.8         | 981  | 0.9  | $\gamma$ CH (M1, M2)                       |
| 32 | 946  | -2.3         | 981  | 0.2  | $\gamma$ CH (M1, M2)                       |
| 33 | 956  | 9.5          | 978  | 5.3  | v ring, $\delta$ N3H, $\delta$ CH (M1, M2) |
| 34 | 953  | 6.9          | 978  | 5.4  | v ring, $\delta$ N3H, $\delta$ CH (M1, M2) |
| 35 | 808  | 5.7          | 832  | 2.3  | $\gamma$ C4=O, $\gamma$ CH (M1, M2)        |
| 36 | 806  | 3.7          | 829  | -0.5 | $\gamma$ C4=O, $\gamma$ CH (M1, M2)        |
| 37 | 772  | 26.6         | 791  | 12.7 | $\gamma$ C2=O (M1, M2)                     |
| 38 | 750  | 4.4          | 775  | -2.8 | $\gamma$ C2=O (M1, M2)                     |
| 39 | 759  | 7.4          | 785  | 4.4  | ring breathing (M1, M2)                    |
| 40 | 756  | 4.4          | 785  | 5.2  | ring breathing (M1, M2)                    |
| 41 | 716  | 3.3          | 733  | 1.0  | $\gamma$ CH (M1, M2)                       |
| 42 | 720  | 7.6          | 730  | -1.1 | $\gamma$ CH (M1, M2)                       |
| 43 | 700  | <b>59.1</b>  | 687  | 7.9  | $\gamma$ N3H (M1, M2)                      |
| 44 | 686  | <b>44.9</b>  | 690  | 11.1 | $\gamma$ N3H (M1, M2)                      |
| 45 | 824  | <b>296.1</b> | 587  | 10.4 | $\gamma$ N1H (M1, M2)                      |
| 46 | 651  | <b>123.7</b> | 584  | 7.5  | $\gamma$ N1H (M1, M2)                      |
| 47 | 565  | 4.7          | 564  | 0.7  | $\delta$ ring (M1, M2)                     |
| 48 | 558  | -1.9         | 563  | 0.3  | $\delta$ ring (M1, M2)                     |
| 49 | 536  | 1.2          | 549  | 0.9  | $\delta$ C=O (M1, M2)                      |
| 50 | 536  | 0.6          | 548  | 0.3  | $\delta$ C=O (M1, M2)                      |
| 51 | 523  | 7.0          | 521  | -3.5 | $\delta$ ring (M1, M2)                     |
| 52 | 526  | 10.0         | 521  | -3.3 | $\delta$ ring (M1, M2)                     |
| 53 | 411  | 21.2         | 419  | 11.8 | $\tau$ (M1, M2)                            |
| 54 | 405  | 15.1         | 412  | 4.8  | $\tau$ (M1, M2)                            |
| 55 | 389  | 1.1          | 395  | -0.7 | $\delta$ C=O, $\delta$ ring (M1, M2)       |
| 56 | 383  | -4.0         | 396  | 0.1  | $\delta$ C=O, $\delta$ ring (M1, M2)       |
| 57 | 195  |              | 188  |      | $\tau$ (M1, M2)                            |
| 58 | 171  |              | 179  |      | $\tau$ (M1, M2)                            |
| 59 | 170  | 8.1          | 173  | 4.3  | $\tau$ (M1, M2)                            |
| 60 | 165  | 19.2         | 149  | -2.8 | $\tau$ (M1, M2)                            |
| 61 | 82   |              | 66   |      | intermolecular mode                        |
| 62 | 47   |              | 49   |      | intermolecular mode                        |
| 63 | 34   |              | 29   |      | intermolecular mode                        |
| 64 | 17   |              | 16   |      | intermolecular mode                        |
| 65 |      |              |      |      | intermolecular mode                        |
| 66 |      |              |      |      | intermolecular mode                        |

<sup>a</sup> Abbreviations: v = stretching;  $\delta$  = in-plane bending;  $\gamma$  = out-of-plane bending;  $\tau$  = torsional; sciss = scissoring; rock = rocking; wagg = wagging; asym = asymmetric; sym = symmetric; M1 = Monomer 1; M2 = Monomer 2.

**Table 14.** Anharmonic vibrational frequencies ( $\text{cm}^{-1}$ ) of hydrogen-bonded adenine dimer, computed using B3LYP, B3LYP-D3 and B3LYP-DCP approaches, and corresponding shifts respect to the isolated molecule ( $\Delta\text{hb}$ ).

| Mode | B3LYP  |                   | B3LYP-D3 |                   | B3LYP-DCP |                   | Assignment <sup>a</sup>                                                                                                     |
|------|--------|-------------------|----------|-------------------|-----------|-------------------|-----------------------------------------------------------------------------------------------------------------------------|
|      | anharm | $\Delta\text{hb}$ | anharm   | $\Delta\text{hb}$ | anharm    | $\Delta\text{hb}$ |                                                                                                                             |
| 1    | 3500   | -36.2             | 3502     | -32.3             | 3498      | <b>-54.2</b>      | $\nu_{\text{asym}}\text{NH}_2$ (M1, M2)                                                                                     |
| 2    | 3500   | -35.3             | 3502     | -31.7             | 3499      | <b>-53.8</b>      | $\nu_{\text{asym}}\text{NH}_2$ (M1, M2)                                                                                     |
| 3    | 3482   | -0.9              | 3484     | 1.7               | 3479      | -4.5              | $\nu_{\text{N}_9\text{H}}$ (M1, M2)                                                                                         |
| 4    | 3481   | -1.0              | 3483     | 1.6               | 3479      | -4.6              | $\nu_{\text{N}_9\text{H}}$ (M1, M2)                                                                                         |
| 5    | 3001   | <b>-443.6</b>     | 2965     | <b>-478.0</b>     | 2979      | <b>-470.4</b>     | $\nu_{\text{sym}}\text{NH}_2$ (M1, M2)                                                                                      |
| 6    | 2980   | <b>-464.7</b>     | 2897     | <b>-546.0</b>     | 2919      | <b>-530.6</b>     | $\nu_{\text{sym}}\text{NH}_2$ (M1, M2)                                                                                      |
| 7    | 3112   | -4.6              | 3102     | -10.1             | 3149      | -0.4              | $\nu_{\text{C}_8\text{H}}$ (M1, M2)                                                                                         |
| 8    | 3111   | -4.8              | 3101     | -11.0             | 3149      | 0.0               | $\nu_{\text{C}_8\text{H}}$ (M1, M2)                                                                                         |
| 9    | 3034   | -10.5             | 3029     | -13.6             | 3062      | -5.6              | $\nu_{\text{C}_2\text{H}}$ (M1, M2)                                                                                         |
| 10   | 3034   | -10.8             | 3030     | -12.1             | 3063      | -4.7              | $\nu_{\text{C}_2\text{H}}$ (M1, M2)                                                                                         |
| 11   | 1648   | 26.5              | 1647     | 23.6              | 1705      | 26.6              | $\delta_{\text{sciss}}\text{NH}_2, \nu_{\text{C}_5\text{C}_6}, \nu_{\text{C}_6\text{N}_6}$ (M1, M2)                         |
| 12   | 1644   | 22.2              | 1645     | 21.6              | 1579      | <b>-99.8</b>      | $\delta_{\text{sciss}}\text{NH}_2, \nu_{\text{C}_5\text{C}_6}, \nu_{\text{C}_6\text{N}_6}$ (M1, M2)                         |
| 13   | 1604   | -17.0             | 1605     | -18.5             | 1529      | <b>-149.6</b>     | $\nu_{\text{C}_5\text{C}_6}, \nu_{\text{C}_6\text{N}_6}, \delta_{\text{sciss}}\text{NH}_2$ (M1, M2)                         |
| 14   | 1591   | -30.9             | 1592     | -31.7             | 1652      | -26.4             | $\nu_{\text{C}_5\text{C}_6}, \nu_{\text{C}_6\text{N}_6}, \delta_{\text{sciss}}\text{NH}_2$ (M1, M2)                         |
| 15   | 1584   | -9.9              | 1584     | -10.3             | 1647      | 6.5               | $\nu_{\text{N}_3\text{C}_4}, \nu_{\text{C}_5\text{C}_6}$ (M1, M2)                                                           |
| 16   | 1584   | 19.6              | 1583     | 18.6              | 1629      | 43.5              | $\delta_{\text{sciss}}\text{NH}_2, \nu_{\text{C}_4\text{C}_5}, \nu_{\text{C}_5\text{C}_6}$ (M1, M2)                         |
| 17   | 1492   | <b>-72.4</b>      | 1495     | <b>-69.9</b>      | 1533      | <b>-52.4</b>      | $\delta_{\text{sciss}}\text{NH}_2, \nu_{\text{C}_6\text{N}_6}$ (M1, M2)                                                     |
| 18   | 1490   | 6.9               | 1490     | 7.8               | 1536      | 14.5              | $\nu_{\text{N}_7\text{C}_8}, \delta_{\text{C}_8\text{H}}$ (M1, M2)                                                          |
| 19   | 1480   | -2.7              | 1481     | -1.4              | 1521      | -0.3              | $\nu_{\text{N}_7\text{C}_8}, \delta_{\text{C}_8\text{H}}$ (M1, M2)                                                          |
| 20   | 1470   | 7.0               | 1468     | 5.2               | 1509      | 11.7              | $\nu_{\text{N}_1\text{C}_6}, \delta_{\text{C}_2\text{H}}, \nu_{\text{C}_2\text{N}_3}, \nu_{\text{C}_6\text{N}_6}$ (M1, M2)  |
| 21   | 1418   | 12.1              | 1418     | 11.4              | 1467      | 14.8              | $\nu_{\text{C}_4\text{C}_5}, \nu_{\text{C}_4\text{N}_9}, \delta_{\text{C}_2\text{H}}$ (M1, M2)                              |
| 22   | 1417   | 11.1              | 1414     | 8.3               | 1467      | 13.9              | $\nu_{\text{C}_4\text{C}_5}, \nu_{\text{C}_4\text{N}_9}, \delta_{\text{C}_2\text{H}}$ (M1, M2)                              |
| 23   | 1380   | -0.6              | 1380     | 0.8               | 1430      | 10.4              | $\delta_{\text{N}_9\text{H}}, \delta_{\text{C}_2\text{H}}, \nu_{\text{C}_4\text{N}_9}, \nu_{\text{C}_8\text{N}_9}$ (M1, M2) |
| 24   | 1380   | -0.8              | 1380     | 0.4               | 1427      | 7.5               | $\delta_{\text{N}_9\text{H}}, \delta_{\text{C}_2\text{H}}, \nu_{\text{C}_4\text{N}_9}, \nu_{\text{C}_8\text{N}_9}$ (M1, M2) |
| 25   | 1342   | 5.3               | 1342     | 5.1               | 1393      | 9.7               | $\delta_{\text{C}_2\text{H}}, \nu_{\text{C}_8\text{N}_9}, \delta_{\text{C}_8\text{H}}, \nu_{\text{C}_6\text{N}_6}$ (M1, M2) |
| 26   | 1340   | 3.0               | 1340     | 3.0               | 1393      | 9.6               | $\delta_{\text{C}_2\text{H}}, \nu_{\text{C}_8\text{N}_9}, \delta_{\text{C}_8\text{H}}, \nu_{\text{C}_6\text{N}_6}$ (M1, M2) |
| 27   | 1324   | -5.7              | 1323     | -4.3              | 1385      | 15.5              | $\nu_{\text{N}_1\text{C}_2}, \nu_{\text{C}_5\text{N}_7}, \nu_{\text{C}_4\text{C}_5}$ (M1, M2)                               |
| 28   | 1324   | -6.1              | 1324     | -3.7              | 1383      | 13.3              | $\nu_{\text{N}_1\text{C}_2}, \nu_{\text{C}_5\text{N}_7}, \nu_{\text{C}_4\text{C}_5}$ (M1, M2)                               |
| 29   | 1312   | 14.0              | 1312     | 16.4              | 1359      | 11.1              | $\nu_{\text{C}_2\text{N}_3}, \nu_{\text{N}_1\text{C}_2}$ (M1, M2)                                                           |
| 30   | 1310   | 12.5              | 1311     | 15.1              | 1357      | 9.2               | $\nu_{\text{C}_2\text{N}_3}, \nu_{\text{N}_1\text{C}_2}$ (M1, M2)                                                           |
| 31   | 1241   | 1.1               | 1239     | 0.5               | 1274      | 7.6               | $\delta_{\text{C}_8\text{H}}, \nu_{\text{N}_7\text{C}_8}, \delta_{\text{N}_9\text{H}}$ (M1, M2)                             |
| 32   | 1239   | -0.8              | 1236     | -28.0             | 1272      | 5.5               | $\delta_{\text{C}_8\text{H}}, \nu_{\text{N}_7\text{C}_8}, \delta_{\text{N}_9\text{H}}$ (M1, M2)                             |
| 33   | 1239   | 14.3              | 1242     | 17.1              | 1264      | 13.3              | $\delta_{\text{rock}}\text{NH}_2, \nu_{\text{C}_5\text{N}_7}, \nu_{\text{C}_2\text{N}_3}$ (M1, M2)                          |
| 34   | 1227   | 2.7               | 1229     | 4.9               | 1262      | 11.5              | $\delta_{\text{rock}}\text{NH}_2, \nu_{\text{C}_5\text{N}_7}, \nu_{\text{C}_2\text{N}_3}$ (M1, M2)                          |
| 35   | 1135   | 11.8              | 1135     | 12.6              | 1168      | 13.1              | $\nu_{\text{C}_4\text{N}_9}, \delta_{\text{r}}, \nu_{\text{C}_6\text{N}_6}$ (M1, M2)                                        |
| 36   | 1132   | 8.8               | 1134     | 11.5              | 1166      | 10.4              | $\nu_{\text{C}_4\text{N}_9}, \delta_{\text{r}}, \nu_{\text{C}_6\text{N}_6}$ (M1, M2)                                        |
| 37   | 1055   | 1.5               | 1055     | 1.5               | 1083      | -0.5              | $\nu_{\text{C}_8\text{N}_9}, \delta_{\text{N}_9\text{H}}$ (M1, M2)                                                          |
| 38   | 1052   | -1.4              | 1055     | 1.4               | 1082      | -0.8              | $\nu_{\text{C}_8\text{N}_9}, \delta_{\text{N}_9\text{H}}$ (M1, M2)                                                          |
| 39   | 1026   | 32.7              | 1032     | 36.8              | 1052      | <b>54.4</b>       | $\delta_{\text{rock}}\text{NH}_2, \nu_{\text{N}_1\text{C}_6}$ (M1, M2)                                                      |
| 40   | 1018   | 24.6              | 1023     | 28.1              | 1043      | 45.4              | $\delta_{\text{rock}}\text{NH}_2, \nu_{\text{N}_1\text{C}_6}$ (M1, M2)                                                      |
| 41   | 934    | -19.4             | 939      | -13.2             | 968       | -8.5              | $\gamma_{\text{C}_2\text{H}}$ (M1, M2)                                                                                      |
| 42   | 934    | -19.0             | 941      | -11.3             | 966       | -10.7             | $\gamma_{\text{C}_2\text{H}}$ (M1, M2)                                                                                      |
| 43   | 931    | 2.4               | 932      | 3.5               | 946       | 3.8               | $\delta_{\text{r}}, \nu_{\text{C}_4\text{C}_5}$ (M1, M2)                                                                    |
| 44   | 931    | 1.8               | 932      | 3.0               | 946       | 3.7               | $\delta_{\text{r}}, \nu_{\text{C}_4\text{C}_5}$ (M1, M2)                                                                    |
| 45   | 896    | 10.6              | 899      | 13.5              | 909       | 14.6              | $\delta_{\text{R}}$ (M1, M2)                                                                                                |

|    |                  |               |                  |              |                  |              |                                                                                                                                           |
|----|------------------|---------------|------------------|--------------|------------------|--------------|-------------------------------------------------------------------------------------------------------------------------------------------|
| 46 | 894              | 8.2           | 895              | 10.5         | 906              | 11.1         | $\delta$ R (M1, M2)                                                                                                                       |
| 47 | 866 <sup>b</sup> |               | 891 <sup>b</sup> |              | 828 <sup>b</sup> |              | $\tau$ NH <sub>2</sub> (M1, M2)                                                                                                           |
| 48 | 749              |               | 633              |              | 751              |              | $\gamma$ C <sub>8</sub> H, $\tau$ NH <sub>2</sub> (M1, M2)                                                                                |
| 49 | 827              | 12.8          | 826              | 13.2         | 845              | -21.6        | $\gamma$ C <sub>8</sub> H (M1, M2)                                                                                                        |
| 50 | 716              | <b>-97.6</b>  | 799              | -14.2        | 805              | <b>-61.9</b> | $\gamma$ C <sub>8</sub> H, $\tau$ NH <sub>2</sub> (M1, M2)                                                                                |
| 51 | 793              | 15.4          | 796              | 16.2         | 828              | -11.3        | $\gamma$ C <sub>8</sub> H, $\tau$ R, $\tau$ r, $\gamma$ C <sub>6</sub> N <sub>6</sub> (M1, M2)                                            |
| 52 | 673              | <b>-105.1</b> | 754              | -25.0        | 802              | -37.4        | $\gamma$ C <sub>8</sub> H, $\tau$ R, $\tau$ r, $\gamma$ C <sub>6</sub> N <sub>6</sub> (M1, M2)                                            |
| 53 | 720              | 5.4           | 721              | 6.4          | 744              | 11.2         | $\nu$ N <sub>3</sub> C <sub>4</sub> , $\nu$ C <sub>5</sub> N <sub>7</sub> , $\nu$ C <sub>4</sub> N <sub>9</sub> (ring breathing) (M1, M2) |
| 54 | 718              | 3.5           | 719              | 4.3          | 745              | 12.7         | $\nu$ N <sub>3</sub> C <sub>4</sub> , $\nu$ C <sub>5</sub> N <sub>7</sub> , $\nu$ C <sub>4</sub> N <sub>9</sub> (ring breathing) (M1, M2) |
| 55 | 670              | 4.4           | 666              | 1.2          | 678              | -21.3        | $\gamma$ C <sub>6</sub> N <sub>6</sub> , $\tau$ r, $\tau$ R (M1, M2)                                                                      |
| 56 | 667              | 0.7           | 671              | 5.7          | 702              | 2.5          | $\gamma$ C <sub>6</sub> N <sub>6</sub> , $\tau$ r, $\tau$ R (M1, M2)                                                                      |
| 57 | 649              | -1.9          | 650              | -0.5         | 663              | -4.4         | $\tau$ r (M1, M2)                                                                                                                         |
| 58 | 646              | -5.4          | 648              | -2.5         | 661              | -6.5         | $\tau$ r (M1, M2)                                                                                                                         |
| 59 | 632              | 22.0          | 633              | 23.2         | 644              | 25.2         | $\delta$ r, $\nu$ C <sub>5</sub> C <sub>6</sub> , $\delta$ R (M1, M2)                                                                     |
| 60 | 624              | 14.6          | 626              | 16.7         | 635              | 17.1         | $\delta$ r, $\nu$ C <sub>5</sub> C <sub>6</sub> , $\delta$ R (M1, M2)                                                                     |
| 61 | 541              | -3.9          | 551              | 6.9          | 570              | -7.8         | $\gamma$ N <sub>9</sub> H, $\gamma$ C <sub>2</sub> H, $\tau$ R, $\tau$ r (M1, M2)                                                         |
| 62 | 544              | -0.5          | 552              | 7.5          | 560              | -17.5        | $\gamma$ N <sub>9</sub> H, $\gamma$ C <sub>2</sub> H, $\tau$ R, $\tau$ r (M1, M2)                                                         |
| 63 | 535              | <b>47.3</b>   | 539              | 33.8         | 545              | 13.0         | $\delta$ R ((M1, M2)                                                                                                                      |
| 64 | 527              | 39.9          | 528              | 22.6         | 535              | 2.9          | $\delta$ R (M1, M2)                                                                                                                       |
| 65 | 464              | <b>-51.0</b>  | 479              | -18.8        | 536              | 21.8         | $\gamma$ N <sub>9</sub> H (M1, M2)                                                                                                        |
| 66 | 465              | <b>-50.1</b>  | 479              | -18.7        | 538              | 23.5         | $\gamma$ N <sub>9</sub> H (M1, M2)                                                                                                        |
| 67 | 528              | 1.2           | 531              | 45.2         | 540              | 16.8         | $\delta_{\text{rock}}$ NH <sub>2</sub> , $\delta$ R, $\delta$ C <sub>6</sub> N <sub>6</sub> (M1, M2)                                      |
| 68 | 525              | 31.3          | 528              | 42.1         | 538              | 15.2         | $\delta_{\text{rock}}$ NH <sub>2</sub> , $\delta$ R, $\delta$ C <sub>6</sub> N <sub>6</sub> (M1, M2)                                      |
| 69 | 460 <sup>b</sup> | -26.3         | 469 <sup>b</sup> | -21.7        | 471 <sup>b</sup> | <b>-57.4</b> | $\tau$ NH <sub>2</sub> (M1, M2)                                                                                                           |
| 70 | 459 <sup>b</sup> | -27.9         | 467 <sup>b</sup> | -23.7        | 469 <sup>b</sup> | <b>-59.3</b> | $\tau$ NH <sub>2</sub> (M1, M2)                                                                                                           |
| 71 | 284              | -8.9          | 287              | -5.5         | 299              | -2.7         | $\tau$ Rr (M1, M2)                                                                                                                        |
| 72 | 284              | -9.0          | 294              | 1.6          | 298              | -4.0         | $\tau$ Rr (M1, M2)                                                                                                                        |
| 73 | 311              | 37.7          | 321              | 44.2         | 322              | 42.1         | $\delta$ C <sub>6</sub> N <sub>6</sub> , $\delta$ R, $\delta$ r (M1, M2)                                                                  |
| 74 | 308              | 34.5          | 315              | 37.8         | 317              | 36.8         | $\delta$ C <sub>6</sub> N <sub>6</sub> , $\delta$ R, $\delta$ r (M1, M2)                                                                  |
| 75 | 217              | -23.2         | 208              | -31.3        | 197              | -31.6        | $\tau$ Rr, $\gamma_{\text{wagg}}$ NH <sub>2</sub> (M1, M2)                                                                                |
| 76 | 208              | -32.7         | 211              | -28.5        | 181              | <b>-47.5</b> | $\tau$ Rr, $\tau$ NH <sub>2</sub> (M1, M2)                                                                                                |
| 77 | 145              | <b>-62.2</b>  | 151              | <b>-54.2</b> | 128              | 22.9         | $\gamma_{\text{wagg}}$ NH <sub>2</sub> , $\tau$ Rr (M1, M2)                                                                               |
| 78 | 151              | <b>-56.4</b>  | 153              | <b>-51.8</b> | 148              | <b>42.5</b>  | $\gamma_{\text{wagg}}$ NH <sub>2</sub> , $\tau$ Rr (M1, M2)                                                                               |
| 79 | 93               |               | 104              |              | 95               |              | intermolecular mode                                                                                                                       |
| 80 | 77               |               | 86               |              | 82               |              | intermolecular mode                                                                                                                       |
| 81 | 10               |               | 23               |              | 51               |              | $\tau$ Rr, $\gamma$ C <sub>6</sub> N <sub>6</sub> (M1, M2)                                                                                |
| 82 | 39               |               | 51               |              | 37               |              | intermolecular mode                                                                                                                       |
| 83 |                  |               | 3                |              |                  |              | intermolecular mode                                                                                                                       |
| 84 |                  |               |                  |              |                  |              | intermolecular mode                                                                                                                       |

<sup>a</sup>Abbreviations:  $\nu$  = stretching;  $\delta$  = in-plane bending;  $\gamma$  = out-of-plane bending;  $\tau$  = torsional; sciss = scissoring; rock = rocking; wagg = wagging; asym = asymmetric; sym = symmetric; R and r refer to the 6-membered ring and 5-membered ring, respectively; M1 = Monomer 1; M2 = Monomer 2.

<sup>b</sup>Modes excluded from the anharmonic calculation.

**Table 15.** Anharmonic vibrational frequencies ( $\text{cm}^{-1}$ ) of stacked adenine dimer, computed using B3LYP-D3 and B3LYP-DCP approaches, and corresponding shifts respect to the isolated molecule ( $\Delta_{\text{stacked}}$ ).

| Mode | B3LYP-D3 |                           | B3LYP-DCP |                           | Assignment <sup>a</sup>                                                                                         |
|------|----------|---------------------------|-----------|---------------------------|-----------------------------------------------------------------------------------------------------------------|
|      | anharm   | $\Delta_{\text{stacked}}$ | anharm    | $\Delta_{\text{stacked}}$ |                                                                                                                 |
| 1    | 3521     | -12.8                     | 3532      | -20.5                     | $\nu_{\text{asym}}\text{NH}_2$ (M2)                                                                             |
| 2    | 3506     | -27.7                     | 3532      | -20.7                     | $\nu_{\text{asym}}\text{NH}_2$ (M1)                                                                             |
| 3    | 3491     | 9.0                       | 3489      | 5.7                       | $\nu\text{N}_9\text{H}$ (M2)                                                                                    |
| 4    | 3487     | 4.6                       | 3489      | 5.5                       | $\nu\text{N}_9\text{H}$ (M1)                                                                                    |
| 5    | 3423     | -20.0                     | 3430      | -19.2                     | $\nu_{\text{sym}}\text{NH}_2$ (M2)                                                                              |
| 6    | 3422     | -21.1                     | 3430      | -19.6                     | $\nu_{\text{sym}}\text{NH}_2$ (M1)                                                                              |
| 7    | 3115     | 3.8                       | 3149      | -0.2                      | $\nu\text{C}_8\text{H}$ (M1)                                                                                    |
| 8    | 3109     | -2.6                      | 3149      | -0.5                      | $\nu\text{C}_8\text{H}$ (M2)                                                                                    |
| 9    | 3050     | 8.1                       | 3080      | 12.3                      | $\nu\text{C}_2\text{H}$ (M2)                                                                                    |
| 10   | 3045     | 2.9                       | 3080      | 12.4                      | $\nu\text{C}_2\text{H}$ (M1)                                                                                    |
| 11   | 1625     | 1.0                       | 1679      | 1.1                       | $\delta_{\text{sciss}}\text{NH}_2, \nu\text{C}_5\text{C}_6, \nu\text{C}_6\text{N}_6$ (M1, M2)                   |
| 12   | 1625     | 1.1                       | 1673      | -5.6                      | $\delta_{\text{sciss}}\text{NH}_2, \nu\text{C}_5\text{C}_6, \nu\text{C}_6\text{N}_6$ (M1, M2)                   |
| 13   | 1599     | 4.3                       | 1649      | 8.8                       | $\nu\text{N}_3\text{C}_4, \nu\text{C}_5\text{C}_6$ (M1, M2)                                                     |
| 14   | 1595     | 0.5                       | 1647      | 6.4                       | $\nu\text{N}_3\text{C}_4, \nu\text{C}_5\text{C}_6$ (M1, M2)                                                     |
| 15   | 1566     | 1.4                       | 1587      | 1.1                       | $\delta_{\text{sciss}}\text{NH}_2, \nu\text{C}_4\text{C}_5, \nu\text{C}_5\text{C}_6$ (M1)                       |
| 16   | 1565     | 0.2                       | 1585      | -0.5                      | $\delta_{\text{sciss}}\text{NH}_2, \nu\text{C}_4\text{C}_5, \nu\text{C}_5\text{C}_6$ (M2)                       |
| 17   | 1484     | 2.3                       | 1521      | -0.1                      | $\nu\text{N}_7\text{C}_8, \delta\text{C}_8\text{H}$ (M1, M2)                                                    |
| 18   | 1482     | 0.2                       | 1520      | -1.0                      | $\nu\text{N}_7\text{C}_8, \delta\text{C}_8\text{H}$ (M1, M2)                                                    |
| 19   | 1464     | 1.2                       | 1496      | -1.3                      | $\nu\text{N}_1\text{C}_6, \delta\text{C}_2\text{H}, \nu\text{C}_2\text{N}_3, \nu\text{C}_6\text{N}_6$ (M1, M2)  |
| 20   | 1463     | -0.2                      | 1495      | -2.8                      | $\nu\text{N}_1\text{C}_6, \delta\text{C}_2\text{H}, \nu\text{C}_2\text{N}_3, \nu\text{C}_6\text{N}_6$ (M1, M2)  |
| 21   | 1406     | 0.3                       | 1452      | -1.0                      | $\nu\text{C}_4\text{C}_5, \nu\text{C}_4\text{N}_9, \delta\text{C}_2\text{H}$ (M1, M2)                           |
| 22   | 1406     | -0.1                      | 1452      | -1.1                      | $\nu\text{C}_4\text{C}_5, \nu\text{C}_4\text{N}_9, \delta\text{C}_2\text{H}$ (M1, M2)                           |
| 23   | 1381     | 1.3                       | 1415      | -4.1                      | $\delta\text{N}_9\text{H}, \delta\text{C}_2\text{H}, \nu\text{C}_4\text{N}_9, \nu\text{C}_8\text{N}_9$ (M1, M2) |
| 24   | 1378     | -1.1                      | 1415      | -4.8                      | $\delta\text{N}_9\text{H}, \delta\text{C}_2\text{H}, \nu\text{C}_4\text{N}_9, \nu\text{C}_8\text{N}_9$ (M1, M2) |
| 25   | 1338     | 1.2                       | 1380      | -3.4                      | $\delta\text{C}_2\text{H}, \nu\text{C}_8\text{N}_9, \delta\text{C}_8\text{H}, \nu\text{C}_6\text{N}_6$ (M1, M2) |
| 26   | 1336     | -1.0                      | 1377      | -6.6                      | $\delta\text{C}_2\text{H}, \nu\text{C}_8\text{N}_9, \delta\text{C}_8\text{H}, \nu\text{C}_6\text{N}_6$ (M1, M2) |
| 27   | 1328     | 0.5                       | 1366      | -3.5                      | $\nu\text{N}_1\text{C}_2, \nu\text{C}_5\text{N}_7, \nu\text{C}_4\text{C}_5$ (M2)                                |
| 28   | 1325     | -2.7                      | 1365      | -4.4                      | $\nu\text{N}_1\text{C}_2, \nu\text{C}_5\text{N}_7, \nu\text{C}_4\text{C}_5$ (M1)                                |
| 29   | 1299     | 3.3                       | 1344      | -3.9                      | $\nu\text{C}_2\text{N}_3, \nu\text{N}_1\text{C}_2$ (M1)                                                         |
| 30   | 1297     | 1.1                       | 1342      | -5.3                      | $\nu\text{C}_2\text{N}_3, \nu\text{N}_1\text{C}_2$ (M2)                                                         |
| 31   | 1244     | 5.7                       | 1263      | -3.5                      | $\delta\text{C}_8\text{H}, \nu\text{N}_7\text{C}_8, \delta\text{N}_9\text{H}$ (M1, M2)                          |
| 32   | 1242     | 3.6                       | 1262      | -5.2                      | $\delta\text{C}_8\text{H}, \nu\text{N}_7\text{C}_8, \delta\text{N}_9\text{H}$ (M1, M2)                          |
| 33   | 1227     | 2.2                       | 1254      | 3.3                       | $\delta_{\text{rock}}\text{NH}_2, \nu\text{C}_5\text{N}_7, \nu\text{C}_2\text{N}_3$ (M1)                        |
| 34   | 1228     | 3.2                       | 1252      | 1.5                       | $\delta_{\text{rock}}\text{NH}_2, \nu\text{C}_5\text{N}_7, \nu\text{C}_2\text{N}_3$ (M2)                        |
| 35   | 1125     | 3.2                       | 1156      | 0.3                       | $\nu\text{C}_4\text{N}_9, \delta\text{r}, \nu\text{C}_6\text{N}_6$ (M1, M2)                                     |
| 36   | 1120     | -1.6                      | 1153      | -2.6                      | $\nu\text{C}_4\text{N}_9, \delta\text{r}, \nu\text{C}_6\text{N}_6$ (M1, M2)                                     |
| 37   | 1053     | -0.2                      | 1080      | -2.7                      | $\nu\text{C}_8\text{N}_9, \delta\text{N}_9\text{H}$ (M1, M2)                                                    |
| 38   | 1053     | -0.4                      | 1080      | -2.8                      | $\nu\text{C}_8\text{N}_9, \delta\text{N}_9\text{H}$ (M1, M2)                                                    |
| 39   | 1010     | 14.8                      | 1011      | 13.4                      | $\delta_{\text{rock}}\text{NH}_2, \nu\text{N}_1\text{C}_6$ (M1)                                                 |
| 40   | 1005     | 10.6                      | 1012      | 14.2                      | $\delta_{\text{rock}}\text{NH}_2, \nu\text{N}_1\text{C}_6$ (M2)                                                 |
| 41   | 941      | -11.5                     | 973       | -3.3                      | $\gamma\text{C}_2\text{H}$ (M1)                                                                                 |
| 42   | 947      | -5.1                      | 973       | -3.4                      | $\gamma\text{C}_2\text{H}$ (M2)                                                                                 |
| 43   | 931      | 2.4                       | 941       | -1.0                      | $\delta\text{r}, \nu\text{C}_4\text{C}_5$ (M1)                                                                  |
| 44   | 931      | 1.8                       | 941       | -1.2                      | $\delta\text{r}, \nu\text{C}_4\text{C}_5$ (M2)                                                                  |
| 45   | 886      | 0.9                       | 893       | -1.9                      | $\delta\text{R}$ (M1)                                                                                           |

|    |                  |              |                  |              |                                                                                                                                                                                                                                                                                                                                    |
|----|------------------|--------------|------------------|--------------|------------------------------------------------------------------------------------------------------------------------------------------------------------------------------------------------------------------------------------------------------------------------------------------------------------------------------------|
| 46 | 887              | 1.8          | 893              | -1.7         | $\delta$ R (M2)                                                                                                                                                                                                                                                                                                                    |
| 47 | 827              | 14.4         | 863              | -3.6         | $\gamma$ C <sub>8</sub> H (M2)                                                                                                                                                                                                                                                                                                     |
| 48 | 829              | 15.8         | 862              | -4.7         | $\gamma$ C <sub>8</sub> H (M1)                                                                                                                                                                                                                                                                                                     |
| 49 | 799              | 19.4         | 836              | -4.1         | $\gamma$ C <sub>8</sub> H, $\tau$ R, $\tau$ r, $\gamma$ C <sub>6</sub> N <sub>6</sub> (M1, M2)                                                                                                                                                                                                                                     |
| 50 | 798              | 18.5         | 836              | -3.6         | $\gamma$ C <sub>8</sub> H, $\tau$ R, $\tau$ r, $\gamma$ C <sub>6</sub> N <sub>6</sub> (M1, M2)                                                                                                                                                                                                                                     |
| 51 | 718              | 3.2          | 733              | 0.5          | $\nu$ N <sub>3</sub> C <sub>4</sub> , $\nu$ C <sub>5</sub> N <sub>7</sub> , $\nu$ C <sub>4</sub> N <sub>9</sub> (ring breathing) (M2, M1)                                                                                                                                                                                          |
| 52 | 717              | 2.2          | 732              | -0.9         | $\nu$ N <sub>3</sub> C <sub>4</sub> , $\nu$ C <sub>5</sub> N <sub>7</sub> , $\nu$ C <sub>4</sub> N <sub>9</sub> (ring breathing) (M1, M2)                                                                                                                                                                                          |
| 53 | 674              | 8.8          | 696              | -3.1         | $\gamma$ C <sub>6</sub> N <sub>6</sub> , $\tau$ r, $\tau$ R (M1, M2)                                                                                                                                                                                                                                                               |
| 54 | 669              | 4.0          | 691              | -8.0         | $\gamma$ C <sub>6</sub> N <sub>6</sub> , $\tau$ r, $\tau$ R (M1, M2)                                                                                                                                                                                                                                                               |
| 55 | 647              | -4.0         | 663              | -5.3         | $\tau$ r (M1, M2)                                                                                                                                                                                                                                                                                                                  |
| 56 | 647              | -3.6         | 663              | -4.9         | $\tau$ r (M1, M2)                                                                                                                                                                                                                                                                                                                  |
| 57 | 611              | 1.7          | 616              | -1.9         | $\delta$ r, $\nu$ C <sub>5</sub> C <sub>6</sub> , $\delta$ R (M1, M2)                                                                                                                                                                                                                                                              |
| 58 | 611              | 1.4          | 616              | -2.5         | $\delta$ r, $\nu$ C <sub>5</sub> C <sub>6</sub> , $\delta$ R (M1, M2)                                                                                                                                                                                                                                                              |
| 59 | 558              | 13.3         | 573              | -4.6         | $\gamma$ N <sub>9</sub> H, $\gamma$ C <sub>2</sub> H, $\tau$ R, $\tau$ r (M1, M2)                                                                                                                                                                                                                                                  |
| 60 | 558              | 13.9         | 575              | -3.3         | $\gamma$ N <sub>9</sub> H, $\gamma$ C <sub>2</sub> H, $\tau$ R, $\tau$ r (M1, M2)                                                                                                                                                                                                                                                  |
| 61 | 526              | 20.6         | 529              | -2.5         | $\delta$ R (M1)                                                                                                                                                                                                                                                                                                                    |
| 62 | 528              | 22.7         | 526              | -5.9         | $\delta$ R (M2)                                                                                                                                                                                                                                                                                                                    |
| 63 | 513              | 14.8         | 519              | 4.7          | $\tau$ NH <sub>2</sub> , $\gamma$ N <sub>9</sub> H (M2), $\gamma$ N <sub>9</sub> H (M1)                                                                                                                                                                                                                                            |
| 64 | 515              | 17.1         | 519              | 4.5          | $\tau$ NH <sub>2</sub> , $\gamma$ N <sub>9</sub> H (M1), $\gamma$ N <sub>9</sub> H (M2)                                                                                                                                                                                                                                            |
| 65 | 493              | 6.7          | 520              | -3.1         | $\tau$ NH <sub>2</sub> , $\delta$ R, $\delta$ C <sub>6</sub> N <sub>6</sub> , $\nu$ C <sub>4</sub> N <sub>9</sub> , $\gamma$ N <sub>9</sub> H (M2), $\gamma$ N <sub>9</sub> H (M1) (D3),<br>$\delta_{\text{rock}}$ NH <sub>2</sub> , $\delta$ R, $\delta$ C <sub>6</sub> N <sub>6</sub> , $\gamma$ N <sub>9</sub> H (M1, M2) (DCP) |
| 66 | 482              | -9.0         | 518              | -5.3         | $\gamma$ N <sub>9</sub> H, $\tau$ NH <sub>2</sub> (M2, M1) (D3),<br>$\delta_{\text{rock}}$ NH <sub>2</sub> , $\delta$ R, $\delta$ C <sub>6</sub> N <sub>6</sub> , $\gamma$ N <sub>9</sub> H (M1, M2) (DCP)                                                                                                                         |
| 67 | 456              | <b>-34.6</b> | 477              | <b>-51.8</b> | $\tau$ NH <sub>2</sub> (M2), $\gamma$ N <sub>9</sub> H (M1) (D3), $\tau$ NH <sub>2</sub> , $\gamma$ N <sub>9</sub> H (M1, M2) (DCP)                                                                                                                                                                                                |
| 68 | 425              | <b>-66.4</b> | 472              | <b>-56.2</b> | $\tau$ NH <sub>2</sub> (M1), $\gamma$ N <sub>9</sub> H (M2) (D3), $\tau$ NH <sub>2</sub> , $\gamma$ N <sub>9</sub> H (M1, M2) (DCP)                                                                                                                                                                                                |
| 69 | 296              | 4.4          | 295              | -6.4         | $\tau$ Rr (M1, M2) (D3), $\gamma_{\text{wagg}}$ NH <sub>2</sub> , $\tau$ Rr (M1, M2) (DCP)                                                                                                                                                                                                                                         |
| 70 | 294              | 2.2          | 301              | -1.0         | $\tau$ Rr (M1, M2) (D3), $\gamma_{\text{wagg}}$ NH <sub>2</sub> , $\tau$ Rr (M1, M2) (DCP)                                                                                                                                                                                                                                         |
| 71 | 275              | -1.8         | 276              | -4.2         | $\delta$ C <sub>6</sub> N <sub>6</sub> , $\delta$ R, $\delta$ r (M1) (D3), $\delta$ C <sub>6</sub> N <sub>6</sub> , $\delta$ R, $\delta$ r (M1, M2) (DCP)                                                                                                                                                                          |
| 72 | 213              | -26.5        | 275              | -5.6         | $\tau$ Rr (M1, M2) (D3), $\delta$ C <sub>6</sub> N <sub>6</sub> , $\delta$ R, $\delta$ r (M1, M2) (DCP)                                                                                                                                                                                                                            |
| 73 | 203              | -35.8        | 214              | -14.1        | $\tau$ Rr (M1, M2)                                                                                                                                                                                                                                                                                                                 |
| 74 | 420 <sup>b</sup> | <b>215.2</b> | 202              | -26.6        | $\gamma_{\text{wagg}}$ NH <sub>2</sub> (M1) (D3), $\tau$ Rr (M1, M2) (DCP)                                                                                                                                                                                                                                                         |
| 75 | 290 <sup>b</sup> | <b>84.8</b>  | 297 <sup>b</sup> | <b>191.7</b> | $\gamma_{\text{wagg}}$ NH <sub>2</sub> (M2) (D3), $\gamma_{\text{wagg}}$ NH <sub>2</sub> (M1, M2) (DCP)                                                                                                                                                                                                                            |
| 76 | 274 <sup>b</sup> | <b>68.6</b>  | 291 <sup>b</sup> | <b>186.1</b> | $\gamma_{\text{wagg}}$ NH <sub>2</sub> (M2) (D3), $\gamma_{\text{wagg}}$ NH <sub>2</sub> (M1, M2) (DCP)                                                                                                                                                                                                                            |
| 77 | 164              | 7.2          | 167              | 14.3         | $\tau$ Rr, $\gamma$ C <sub>6</sub> N <sub>6</sub> (M1, M2)                                                                                                                                                                                                                                                                         |
| 78 | 158              | 1.1          | 163              | 9.8          | $\tau$ Rr, $\gamma$ C <sub>6</sub> N <sub>6</sub> (M1, M2)                                                                                                                                                                                                                                                                         |
| 79 | 66               |              | 68               |              | intermolecular mode                                                                                                                                                                                                                                                                                                                |
| 80 | 54               |              | 55               |              | intermolecular mode                                                                                                                                                                                                                                                                                                                |
| 81 | 37               |              | 39               |              | intermolecular mode                                                                                                                                                                                                                                                                                                                |
| 82 | 27               |              | 25               |              | intermolecular mode                                                                                                                                                                                                                                                                                                                |
| 83 | 9                |              | 14               |              | intermolecular mode                                                                                                                                                                                                                                                                                                                |
| 84 |                  |              |                  |              | intermolecular mode                                                                                                                                                                                                                                                                                                                |

<sup>a</sup>Abbreviations:  $\nu$  = stretching;  $\delta$  = in-plane bending;  $\gamma$  = out-of-plane bending;  $\tau$  = torsional; sciss = scissoring; rock = rocking; wagg = wagging; asym = asymmetric; sym = symmetric; R and r refer to the 6-membered ring and 5-membered ring, respectively; M1 = Monomer 1; M2 = Monomer 2.

<sup>b</sup>Modes excluded from the anharmonic calculation.

**Table 16.** Anharmonic vibrational frequencies ( $\text{cm}^{-1}$ ) of adenine molecule in the stacked adenine-naphthalene dimer, computed using B3LYP-D3 and B3LYP-DCP approaches, and corresponding shifts respect to the isolated molecule ( $\Delta\text{stacked}$ ).

| Mode | B3LYP-D3         |                        | B3LYP-DCP        |                        | Assignment <sup>a</sup>                                                                                |
|------|------------------|------------------------|------------------|------------------------|--------------------------------------------------------------------------------------------------------|
|      | anharm           | $\Delta\text{stacked}$ | anharm           | $\Delta\text{stacked}$ |                                                                                                        |
| 1    | 3520             | -13.5                  | 3537             | -15.3                  | $\nu_{\text{asym}}\text{NH}_2$                                                                         |
| 2    | 3463             | -18.5                  | 3473             | -10.7                  | $\nu\text{N}_9\text{H}$                                                                                |
| 3    | 3425             | -18.0                  | 3433             | -15.9                  | $\nu_{\text{sym}}\text{NH}_2$                                                                          |
| 4    | 3117             | 5.2                    | 3154             | 4.5                    | $\nu\text{C}_8\text{H}$                                                                                |
| 5    | 3034             | -8.1                   | 3049             | -18.6                  | $\nu\text{C}_2\text{H}$                                                                                |
| 6    | 1627             | 3.4                    | 1679             | 1.1                    | $\delta_{\text{sciss}}\text{NH}_2, \nu\text{C}_5\text{C}_6, \nu\text{C}_6\text{N}_6$                   |
| 7    | 1601             | 7.0                    | 1648             | 7.8                    | $\nu\text{N}_3\text{C}_4, \nu\text{C}_5\text{C}_6$                                                     |
| 8    | 1562             | -2.8                   | 1584             | -1.4                   | $\delta_{\text{sciss}}\text{NH}_2, \nu\text{C}_4\text{C}_5, \nu\text{C}_5\text{C}_6$                   |
| 9    | 1483             | 1.2                    | 1519             | -1.9                   | $\nu\text{N}_7\text{C}_8, \delta\text{C}_8\text{H}$                                                    |
| 10   | 1464             | 0.4                    | 1496             | -1.5                   | $\nu\text{N}_1\text{C}_6, \delta\text{C}_2\text{H}, \nu\text{C}_2\text{N}_3, \nu\text{C}_6\text{N}_6$  |
| 11   | 1408             | 1.5                    | 1452             | -1.0                   | $\nu\text{C}_4\text{C}_5, \nu\text{C}_4\text{N}_9, \delta\text{C}_2\text{H}$                           |
| 12   | 1379             | -0.9                   | 1421             | 1.7                    | $\delta\text{N}_9\text{H}, \delta\text{C}_2\text{H}, \nu\text{C}_4\text{N}_9, \nu\text{C}_8\text{N}_9$ |
| 13   | 1338             | 1.2                    | 1386             | 2.1                    | $\delta\text{C}_2\text{H}, \nu\text{C}_8\text{N}_9, \delta\text{C}_8\text{H}, \nu\text{C}_6\text{N}_6$ |
| 14   | 1326             | -1.2                   | 1367             | -2.9                   | $\nu\text{N}_1\text{C}_2, \nu\text{C}_5\text{N}_7, \nu\text{C}_4\text{C}_5$                            |
| 15   | 1301             | 4.9                    | 1347             | -0.9                   | $\nu\text{C}_2\text{N}_3, \nu\text{N}_1\text{C}_2$                                                     |
| 16   | 1242             | 3.1                    | 1271             | 4.5                    | $\delta\text{C}_8\text{H}, \nu\text{N}_7\text{C}_8, \delta\text{N}_9\text{H}$                          |
| 17   | 1227             | 2.5                    | 1256             | 5.4                    | $\delta_{\text{rock}}\text{NH}_2, \nu\text{C}_5\text{N}_7, \nu\text{C}_2\text{N}_3$                    |
| 18   | 1122             | -0.1                   | 1156             | 1.0                    | $\nu\text{C}_4\text{N}_9, \delta\text{r}, \nu\text{C}_6\text{N}_6$                                     |
| 19   | 1062             | 8.4                    | 1089             | 6.0                    | $\nu\text{C}_8\text{N}_9, \delta\text{N}_9\text{H}$                                                    |
| 20   | 1003             | 8.6                    | 1011             | 13.1                   | $\delta_{\text{rock}}\text{NH}_2, \nu\text{N}_1\text{C}_6$                                             |
| 21   | 954              | 1.5                    | 970              | -6.3                   | $\gamma\text{C}_2\text{H}$                                                                             |
| 22   | 931              | 2.2                    | 944              | 1.5                    | $\delta\text{r}, \nu\text{C}_4\text{C}_5$                                                              |
| 23   | 886              | 0.8                    | 897              | 2.5                    | $\delta\text{R}$                                                                                       |
| 24   | 805              | -8.4                   | 872              | 5.1                    | $\gamma\text{C}_8\text{H}$                                                                             |
|      | 824              | 11.4                   |                  |                        | $\gamma\text{C}_8\text{H}$                                                                             |
| 25   | 810              | 30.1                   | 841              | 1.5                    | $\gamma\text{C}_8\text{H}, \tau\text{R}, \tau\text{r}, \gamma\text{C}_6\text{N}_6$                     |
| 26   | 718              | 3.3                    | 734              | 1.8                    | $\nu\text{N}_3\text{C}_4, \nu\text{C}_5\text{N}_7, \nu\text{C}_4\text{N}_9$ (ring breathing)           |
| 27   | 673              | 7.5                    | 694              | -5.4                   | $\gamma\text{C}_6\text{N}_6, \tau\text{r}, \tau\text{R}$                                               |
| 28   | 654              | 3.1                    | 665              | -3.2                   | $\tau\text{r}$                                                                                         |
| 29   | 612              | 2.8                    | 618              | 0.0                    | $\delta\text{r}, \nu\text{C}_5\text{C}_6, \delta\text{R}$                                              |
| 30   | 567              | 22.7                   | 573              | -5.0                   | $\gamma\text{N}_9\text{H}, \gamma\text{C}_2\text{H}, \tau\text{R}, \tau\text{r}$                       |
| 31   | 523              | 18.3                   | 532              | 0.2                    | $\delta\text{R}, \gamma\text{N}_9\text{H}$                                                             |
| 32   | 518              | 20.0                   | 520              | -8.1                   | $\tau\text{NH}_2, \gamma\text{N}_9\text{H}$                                                            |
| 33   | 522              | 30.5                   | 520              | 5.8                    | $\gamma\text{N}_9\text{H}$                                                                             |
| 34   | 461              | -24.5                  | 512              | -11.2                  | $\tau\text{NH}_2, \delta\text{R}$                                                                      |
| 35   | 291              | -0.6                   | 307              | 5.6                    | $\tau\text{Rr}, \gamma_{\text{wagg}}\text{NH}_2$                                                       |
| 36   | 268              | -8.6                   | 275              | -4.8                   | $\delta\text{C}_6\text{N}_6, \delta\text{R}, \delta\text{r}$                                           |
| 37   | 218              | -21.2                  | 203              | -25.4                  | $\tau\text{Rr}, \gamma_{\text{wagg}}\text{NH}_2$                                                       |
| 38   | 168              | -37.2                  |                  |                        | $\gamma_{\text{wagg}}\text{NH}_2, \tau\text{Rr}$                                                       |
|      | 330 <sup>b</sup> | <b>124.8</b>           | 265 <sup>b</sup> | <b>159.4</b>           | $\gamma_{\text{wagg}}\text{NH}_2, \tau\text{Rr}$                                                       |
| 39   | 164              | 7.4                    | 166              | 13.6                   | $\tau\text{Rr}, \gamma\text{C}_6\text{N}_6$                                                            |

<sup>a</sup>Abbreviations:  $\nu$  = stretching;  $\delta$  = in-plane bending;  $\gamma$  = out-of-plane bending;  $\tau$  = torsional; sciss = scissoring; rock = rocking; wagg = wagging; asym = asymmetric; sym = symmetric; R and r refer to the 6-membered ring and 5-membered ring, respectively.

<sup>b</sup>Modes excluded from the anharmonic calculation.
